# Supplementary material
Source: PubMed Central journal article supplement (PMC8532043)
Supplement: NIHMS1660674-supplement-13.pdf [file NIHMS1660674-supplement-13.pdf]

## Supplementary Tables

**Supplementary Table 1.** Expression levels of miRNAs in jejunal ICCs and colonic ICCs from diabetic *Kit<sup>copGFP/+</sup>;Lep<sup>ob/ob</sup>* and wild type *Kit<sup>copGFP/+</sup>;Lep<sup>+/+</sup>* mice obtained by miRNA-seq.

**Supplementary Table 2.** Clinical characterization of patients with idiopathic and/or diabetic gastroparesis.

**Supplementary Table 3.** Expression levels of miRNAs in blood samples collected from healthy control (HC, n=2) subjects, idiopathic gastroparesis high insulin (IG-HI, n=2), idiopathic gastroparesis low insulin patients (IG-LI, n=2), and diabetic gastroparesis (DG, n=2) patients obtained by miRNA-seq.

**Supplementary Table 4.** Oligonucleotides (primers, miRNAs, and siRNAs) used in this study.

**Supplementary Table 5.** Primary antibodies used in this study.

**Supplementary Table 6.** Drugs used in this study.

Journal Pre-proof

**Supplementary Table 1.** Expression levels of miRNAs in jejunal ICCs and colonic ICCs from diabetic *Kit<sup>copGFP/+</sup>;Lep<sup>ob/ob</sup>* and wild type *Kit<sup>copGFP/+</sup>;Lep<sup>+/+</sup>* mice obtained by miRNA-seq

| miRNA Name   | Normalized Reads (Number) |          |         |         | Change of Reads (Number) |
|--------------|---------------------------|----------|---------|---------|--------------------------|
|              | WT                        |          | ob/ob   |         |                          |
|              | CICC                      | JICC     | CICC    | JICC    | ob/ob-+/+                |
| miR-10a-5p   | 188031.1                  | 474072.5 | 42730.5 | 61758.1 | -278807.5                |
| miR-143-3p   | 281600.2                  | 345646.5 | 49714.1 | 64861.5 | -256335.5                |
| miR-10b-5p   | 278419.5                  | 58151.9  | 4421.7  | 6352.9  | -162898.4                |
| miR-99b-5p   | 71743.2                   | 85929.8  | 3009.5  | 3763.0  | -75450.3                 |
| miR-125a-5p  | 46778.6                   | 58292.8  | 20161.8 | 17260.0 | -33824.8                 |
| miR-191-5p   | 44092.8                   | 33015.9  | 4624.1  | 4837.6  | -33823.5                 |
| miR-100-5p   | 29431.4                   | 45247.8  | 3353.4  | 4384.2  | -33470.8                 |
| miR-99a-5p   | 39300.9                   | 19739.1  | 2224.3  | 2567.2  | -27124.2                 |
| let-7f-5p    | 18944.7                   | 30199.5  | 8974.7  | 10519.0 | -14825.3                 |
| miR-127-3p   | 9161.8                    | 5452.7   | 1067.5  | 929.1   | -6309.0                  |
| miR-27b-3p   | 8968.8                    | 14149.8  | 6178.7  | 5993.4  | -5473.2                  |
| miR-125b-5p  | 19859.0                   | 17436.7  | 16305.4 | 14736.8 | -3126.8                  |
| miR-145a-3p  | 6668.5                    | 8023.7   | 4111.7  | 4487.5  | -3046.4                  |
| miR-486b-5p  | 3152.6                    | 2103.4   | 417.5   | 453.4   | -2192.5                  |
| miR-541-5p   | 3841.6                    | 2335.0   | 1347.4  | 1424.7  | -1702.3                  |
| miR-409-5p   | 1791.7                    | 1694.9   | 113.9   | 110.0   | -1631.3                  |
| miR-351-5p   | 864.2                     | 3498.5   | 1053.2  | 1058.0  | -1125.7                  |
| miR-151-5p   | 1827.6                    | 1056.4   | 292.6   | 370.1   | -1110.7                  |
| miR-5099     | 1433.1                    | 2067.0   | 711.6   | 591.2   | -1098.7                  |
| miR-92b-3p   | 524.7                     | 1262.0   | 102.8   | 111.1   | -786.4                   |
| miR-151-3p   | 1178.5                    | 543.4    | 94.9    | 110.0   | -758.5                   |
| miR-342-3p   | 1183.3                    | 1099.9   | 393.8   | 525.7   | -681.9                   |
| miR-184-3p   | 1201.3                    | 151.2    | 0.0     | 0.0     | -676.2                   |
| miR-501-3p   | 1055.4                    | 463.8    | 99.6    | 104.5   | -657.6                   |
| miR-181a-5p  | 2068.4                    | 1147.5   | 1067.5  | 896.8   | -625.8                   |
| miR-152-3p   | 427.9                     | 656.8    | 142.3   | 185.6   | -378.4                   |
| miR-199a-5p  | 414.2                     | 494.1    | 99.6    | 87.8    | -360.4                   |
| miR-148a-3p  | 688.5                     | 552.0    | 238.8   | 313.4   | -344.1                   |
| miR-125b-3p  | 377.7                     | 439.2    | 69.6    | 88.9    | -329.2                   |
| miR-92a-3p_1 | 635.9                     | 757.5    | 379.5   | 369.0   | -322.5                   |
| miR-92a-3p_2 | 635.9                     | 757.5    | 379.5   | 369.0   | -322.5                   |
| miR-192-5p   | 344.2                     | 247.4    | 14.2    | 20.0    | -278.7                   |
| miR-21a-5p   | 663.4                     | 471.8    | 300.5   | 321.2   | -256.8                   |
| miR-3968     | 399.2                     | 160.3    | 30.0    | 57.8    | -235.9                   |
| miR-212-5p   | 249.8                     | 242.8    | 0.0     | 31.1    | -230.7                   |
| miR-196b-5p  | 443.4                     | 6.3      | 7.9     | 0.0     | -220.9                   |
| miR-214-3p   | 402.8                     | 36.6     | 0.0     | 0.0     | -219.7                   |
| miR-411-5p   | 221.1                     | 220.4    | 0.0     | 6.7     | -217.5                   |

|             |        |        |        |        |        |
|-------------|--------|--------|--------|--------|--------|
| let-7e-5p   | 1482.2 | 2069.1 | 1609.9 | 1556.0 | -192.7 |
| miR-335-3p  | 349.0  | 156.3  | 56.9   | 64.5   | -192.0 |
| miR-484     | 259.4  | 307.5  | 117.0  | 80.0   | -184.9 |
| miR-322-3p  | 203.2  | 763.3  | 275.2  | 325.6  | -182.8 |
| miR-25-3p   | 297.6  | 285.1  | 112.3  | 106.7  | -181.9 |
| miR-215-5p  | 25.1   | 387.6  | 31.6   | 47.8   | -166.7 |
| miR-27a-3p  | 305.4  | 242.8  | 107.5  | 112.2  | -164.2 |
| miR-1a-3p   | 320.9  | 1678.5 | 638.9  | 1050.8 | -154.9 |
| miR-22-3p   | 702.8  | 1559.7 | 915.7  | 1042.4 | -152.2 |
| miR-101a-3p | 147.0  | 140.3  | 0.0    | 20.0   | -133.6 |
| miR-199b-3p | 299.2  | 83.6   | 51.7   | 71.5   | -129.8 |
| miR-200b-3p | 164.9  | 80.4   | 7.9    | 0.0    | -118.7 |
| miR-434-5p  | 145.8  | 202.7  | 71.2   | 53.3   | -112.0 |
| miR-423-3p  | 194.8  | 134.6  | 52.2   | 54.5   | -111.4 |
| miR-10b-3p  | 224.7  | 11.5   | 11.1   | 12.2   | -106.4 |
| miR-139-3p  | 143.4  | 91.0   | 17.4   | 17.8   | -99.6  |
| miR-222-3p  | 271.3  | 35.5   | 58.5   | 62.2   | -93.0  |
| miR-181a-3p | 47.8   | 148.9  | 9.5    | 15.6   | -85.8  |
| miR-615-3p  | 46.6   | 203.3  | 30.0   | 51.1   | -84.4  |
| miR-370-3p  | 46.6   | 125.4  | 7.9    | 0.0    | -82.1  |
| miR-6240    | 88.5   | 197.0  | 61.7   | 61.1   | -81.3  |
| miR-409-3p  | 89.6   | 129.4  | 33.2   | 24.4   | -80.7  |
| miR-204-5p  | 124.3  | 111.7  | 42.7   | 37.8   | -77.7  |
| miR-3470b   | 4.2    | 150.6  | 0.0    | 0.0    | -77.4  |
| miR-434-3p  | 193.6  | 191.2  | 117.0  | 124.5  | -71.7  |
| miR-136-3p  | 43.0   | 118.0  | 12.7   | 7.8    | -70.3  |
| miR-9-5p    | 155.0  | 29.8   | 25.3   | 21.1   | -69.2  |
| miR-128-3p  | 132.7  | 80.2   | 36.4   | 45.6   | -65.5  |
| miR-379-5p  | 117.1  | 77.3   | 30.0   | 37.8   | -63.3  |
| miR-1981-3p | 65.7   | 64.1   | 14.2   | 0.0    | -57.8  |
| miR-126a-5p | 89.6   | 114.5  | 50.6   | 44.5   | -54.6  |
| miR-377-3p  | 40.6   | 85.3   | 9.5    | 11.1   | -52.7  |
| miR-666-5p  | 66.9   | 28.6   | 0.0    | 0.0    | -47.8  |
| miR-146b-5p | 161.4  | 39.5   | 34.8   | 74.5   | -45.8  |
| miR-574-3p  | 105.2  | 23.5   | 22.1   | 16.7   | -44.9  |
| miR-140-3p  | 135.1  | 105.9  | 56.9   | 101.1  | -41.5  |
| miR-411-3p  | 44.2   | 56.7   | 11.1   | 8.9    | -40.5  |
| miR-181b-5p | 429.1  | 151.4  | 296.5  | 203.4  | -40.3  |
| miR-676-3p  | 95.6   | 61.8   | 30.0   | 50.0   | -38.7  |
| miR-674-3p  | 72.9   | 30.3   | 9.5    | 16.7   | -38.6  |
| miR-700-3p  | 38.2   | 37.8   | 0.0    | 0.0    | -38.0  |
| miR-182-5p  | 50.2   | 21.8   | 0.0    | 0.0    | -36.0  |
| miR-148b-3p | 209.2  | 189.0  | 136.0  | 191.1  | -35.5  |
| miR-362-5p  | 88.5   | 48.1   | 36.4   | 35.6   | -32.3  |
| miR-124-3p  | 55.8   | 14.7   | 5.3    | 4.1    | -30.6  |

|              |       |       |       |       |       |
|--------------|-------|-------|-------|-------|-------|
| miR-199b-5p  | 40.6  | 16.6  | 0.0   | 0.0   | -28.6 |
| miR-505-5p   | 50.2  | 14.9  | 7.9   | 0.0   | -28.6 |
| miR-329-3p   | 39.4  | 51.5  | 12.7  | 23.3  | -27.5 |
| miR-221-5p   | 59.8  | 10.9  | 9.5   | 10.0  | -25.6 |
| miR-195a-5p  | 101.6 | 53.8  | 41.1  | 64.5  | -24.9 |
| miR-375-3p   | 29.9  | 16.0  | 0.0   | 0.0   | -23.0 |
| miR-532-5p   | 17.9  | 30.9  | 0.0   | 5.6   | -21.6 |
| miR-671-3p   | 15.5  | 26.9  | 0.0   | 0.0   | -21.2 |
| miR-1943-5p  | 34.7  | 11.5  | 0.0   | 5.6   | -20.3 |
| miR-574-5p   | 37.1  | 2.9   | 0.0   | 0.0   | -20.0 |
| miR-28a-5p   | 71.7  | 108.2 | 61.7  | 78.3  | -20.0 |
| miR-342-5p   | 49.0  | 47.5  | 23.7  | 34.5  | -19.2 |
| miR-381-3p   | 14.3  | 33.2  | 9.5   | 0.0   | -19.0 |
| miR-1843b-3p | 7.2   | 29.8  | 0.0   | 0.0   | -18.5 |
| miR-2137     | 13.1  | 21.8  | 0.0   | 0.0   | -17.5 |
| miR-877-5p   | 23.9  | 9.2   | 0.0   | 0.0   | -16.5 |
| miR-101b-3p  | 8.4   | 24.6  | 0.0   | 0.0   | -16.5 |
| miR-205-5p   | 32.3  | 0.0   | 0.0   | 0.0   | -16.1 |
| miR-149-5p   | 98.0  | 138.6 | 120.2 | 84.5  | -16.0 |
| miR-503-3p   | 75.3  | 282.9 | 178.7 | 148.9 | -15.3 |
| miR-3470a    | 0.0   | 30.3  | 0.0   | 0.0   | -15.2 |
| miR-1193-3p  | 14.3  | 41.2  | 7.9   | 17.8  | -14.9 |
| miR-126a-3p  | 113.6 | 228.5 | 180.3 | 132.2 | -14.7 |
| miR-669c-5p  | 38.2  | 20.6  | 14.2  | 15.6  | -14.5 |
| miR-300-3p   | 0.0   | 26.3  | 0.0   | 0.0   | -13.2 |
| miR-369-5p   | 22.7  | 3.4   | 0.0   | 0.0   | -13.1 |
| miR-203-3p   | 13.1  | 20.6  | 0.0   | 7.8   | -13.0 |
| miR-132-3p   | 41.8  | 38.9  | 20.6  | 34.5  | -12.9 |
| miR-30b-3p   | 25.1  | 20.6  | 7.9   | 15.6  | -11.1 |
| miR-93-3p    | 7.2   | 14.9  | 0.0   | 0.0   | -11.0 |
| miR-425-3p   | 9.6   | 11.5  | 0.0   | 0.0   | -10.5 |
| miR-378c     | 83.1  | 144.0 | 91.7  | 114.5 | -10.4 |
| miR-673-5p   | 7.2   | 10.3  | 0.0   | 0.0   | -8.7  |
| miR-582-3p   | 6.0   | 11.5  | 0.0   | 0.0   | -8.7  |
| miR-3057-5p  | 0.0   | 16.0  | 0.0   | 0.0   | -8.0  |
| miR-181c-5p  | 6.0   | 19.5  | 9.5   | 0.0   | -8.0  |
| miR-8114     | 15.5  | 0.0   | 0.0   | 0.0   | -7.8  |
| miR-136-5p   | 0.0   | 14.9  | 0.0   | 0.0   | -7.4  |
| miR-138-5p   | 6.6   | 8.3   | 0.0   | 0.0   | -7.4  |
| miR-410-3p   | 10.8  | 12.6  | 0.0   | 8.9   | -7.2  |
| miR-26b-3p   | 0.0   | 14.3  | 0.0   | 0.0   | -7.2  |
| miR-130b-5p  | 0.0   | 13.7  | 0.0   | 0.0   | -6.9  |
| miR-1843b-5p | 0.0   | 13.7  | 0.0   | 0.0   | -6.9  |
| miR-20a-5p   | 7.2   | 6.3   | 0.0   | 0.0   | -6.7  |
| miR-873a-3p  | 6.0   | 7.4   | 0.0   | 0.0   | -6.7  |

|               |      |      |     |      |      |
|---------------|------|------|-----|------|------|
| miR-1843a-3p  | 0.0  | 13.2 | 0.0 | 0.0  | -6.6 |
| miR-421-3p    | 0.0  | 12.6 | 0.0 | 0.0  | -6.3 |
| miR-23b-5p    | 10.8 | 18.3 | 0.0 | 16.7 | -6.2 |
| miR-668-3p    | 8.4  | 4.0  | 0.0 | 0.0  | -6.2 |
| miR-7019-3p   | 6.0  | 6.3  | 0.0 | 0.0  | -6.1 |
| miR-181c-3p   | 0.0  | 10.9 | 0.0 | 0.0  | -5.4 |
| miR-200a-3p   | 6.0  | 4.6  | 0.0 | 0.0  | -5.3 |
| miR-667-3p    | 0.0  | 18.3 | 7.9 | 0.0  | -5.2 |
| miR-181d-3p   | 0.0  | 10.3 | 0.0 | 0.0  | -5.2 |
| miR-339-3p    | 0.0  | 10.3 | 0.0 | 0.0  | -5.2 |
| miR-450a-1-3p | 0.0  | 10.3 | 0.0 | 0.0  | -5.2 |
| miR-93-5p     | 9.6  | 19.5 | 7.9 | 11.1 | -5.0 |
| miR-196a-5p   | 14.3 | 4.6  | 6.3 | 3.3  | -4.6 |
| miR-467c-5p   | 0.0  | 9.2  | 0.0 | 0.0  | -4.6 |
| miR-194-5p    | 21.5 | 41.8 | 7.9 | 46.7 | -4.4 |
| miR-379-3p    | 0.0  | 8.6  | 0.0 | 0.0  | -4.3 |
| miR-493-5p    | 0.0  | 8.6  | 0.0 | 0.0  | -4.3 |
| miR-5126      | 0.0  | 8.6  | 0.0 | 0.0  | -4.3 |
| miR-25-5p     | 8.4  | 0.0  | 0.0 | 0.0  | -4.2 |
| miR-382-3p    | 0.0  | 8.0  | 0.0 | 0.0  | -4.0 |
| miR-200c-3p   | 7.2  | 5.4  | 0.0 | 5.6  | -3.5 |
| miR-345-5p    | 0.0  | 6.9  | 0.0 | 0.0  | -3.4 |
| miR-3475-3p   | 0.0  | 6.9  | 0.0 | 0.0  | -3.4 |
| miR-450b-5p   | 0.0  | 16.6 | 0.0 | 10.0 | -3.3 |
| miR-874-3p    | 12.0 | 0.0  | 0.0 | 5.6  | -3.2 |
| miR-140-5p    | 0.0  | 6.3  | 0.0 | 0.0  | -3.1 |
| miR-152-5p    | 0.0  | 6.3  | 0.0 | 0.0  | -3.1 |
| miR-712-5p    | 0.0  | 6.3  | 0.0 | 0.0  | -3.1 |
| miR-17-5p     | 6.0  | 0.0  | 0.0 | 0.0  | -3.0 |
| miR-21a-3p    | 6.0  | 0.0  | 0.0 | 0.0  | -3.0 |
| miR-301a-3p   | 6.0  | 0.0  | 0.0 | 0.0  | -3.0 |
| miR-504-5p    | 6.0  | 0.0  | 0.0 | 0.0  | -3.0 |
| miR-664-5p    | 6.0  | 0.0  | 0.0 | 0.0  | -3.0 |
| miR-486a-3p   | 0.0  | 12.6 | 0.0 | 6.7  | -3.0 |
| miR-28c       | 0.0  | 9.7  | 0.0 | 3.9  | -2.9 |
| miR-450b-3p   | 0.0  | 5.7  | 0.0 | 0.0  | -2.9 |
| miR-134-5p    | 15.5 | 3.4  | 7.9 | 5.6  | -2.8 |
| miR-148b-5p   | 0.0  | 5.2  | 0.0 | 0.0  | -2.6 |
| miR-383-5p    | 0.0  | 5.2  | 0.0 | 0.0  | -2.6 |
| miR-6538      | 0.0  | 5.2  | 0.0 | 0.0  | -2.6 |
| miR-9-3p      | 4.8  | 0.0  | 0.0 | 0.0  | -2.4 |
| miR-1187      | 0.0  | 4.6  | 0.0 | 0.0  | -2.3 |
| miR-6986-5p   | 0.0  | 4.6  | 0.0 | 0.0  | -2.3 |
| miR-1194      | 0.0  | 4.0  | 0.0 | 0.0  | -2.0 |
| miR-187-5p    | 0.0  | 4.0  | 0.0 | 0.0  | -2.0 |

|              |     |      |     |     |      |
|--------------|-----|------|-----|-----|------|
| miR-341-3p   | 0.0 | 4.0  | 0.0 | 0.0 | -2.0 |
| miR-376b-5p  | 0.0 | 4.0  | 0.0 | 0.0 | -2.0 |
| miR-466g     | 0.0 | 4.0  | 0.0 | 0.0 | -2.0 |
| miR-5121     | 0.0 | 4.0  | 0.0 | 0.0 | -2.0 |
| miR-706      | 0.0 | 4.0  | 0.0 | 0.0 | -2.0 |
| miR-144-3p   | 0.0 | 3.4  | 0.0 | 0.0 | -1.7 |
| miR-3057-3p  | 0.0 | 3.4  | 0.0 | 0.0 | -1.7 |
| miR-323-5p   | 0.0 | 3.4  | 0.0 | 0.0 | -1.7 |
| miR-455-5p   | 0.0 | 3.4  | 0.0 | 0.0 | -1.7 |
| miR-615-5p   | 0.0 | 3.4  | 0.0 | 0.0 | -1.7 |
| miR-6944-3p  | 0.0 | 3.4  | 0.0 | 0.0 | -1.7 |
| miR-7047-3p  | 0.0 | 3.4  | 0.0 | 0.0 | -1.7 |
| miR-935      | 0.0 | 3.4  | 0.0 | 0.0 | -1.7 |
| miR-148a-5p  | 0.0 | 2.9  | 0.0 | 0.0 | -1.4 |
| miR-1947-5p  | 0.0 | 2.9  | 0.0 | 0.0 | -1.4 |
| miR-210-3p   | 0.0 | 2.9  | 0.0 | 0.0 | -1.4 |
| miR-331-3p   | 0.0 | 2.9  | 0.0 | 0.0 | -1.4 |
| miR-339-5p   | 0.0 | 2.9  | 0.0 | 0.0 | -1.4 |
| miR-361-3p   | 0.0 | 2.9  | 0.0 | 0.0 | -1.4 |
| miR-365-2-5p | 0.0 | 2.9  | 0.0 | 0.0 | -1.4 |
| miR-467e-5p  | 0.0 | 2.9  | 0.0 | 0.0 | -1.4 |
| miR-541-3p   | 0.0 | 2.9  | 0.0 | 0.0 | -1.4 |
| miR-92b-5p   | 0.0 | 2.9  | 0.0 | 0.0 | -1.4 |
| miR-466e-3p  | 1.2 | 1.5  | 0.0 | 0.0 | -1.3 |
| miR-466p-3p  | 1.2 | 1.5  | 0.0 | 0.0 | -1.3 |
| miR-467b-5p  | 0.0 | 2.4  | 0.0 | 0.0 | -1.2 |
| miR-344d-3p  | 0.0 | 2.3  | 0.0 | 0.0 | -1.1 |
| miR-1843a-5p | 0.0 | 8.6  | 0.0 | 6.7 | -1.0 |
| miR-323-3p   | 0.0 | 16.0 | 7.9 | 6.7 | -0.7 |
| miR-5128     | 0.0 | 1.4  | 0.0 | 0.0 | -0.7 |
| miR-133b-3p  | 0.0 | 1.3  | 0.0 | 0.0 | -0.7 |
| miR-3068-3p  | 0.0 | 6.9  | 0.0 | 5.6 | -0.7 |
| miR-378b     | 0.0 | 1.1  | 0.0 | 0.0 | -0.6 |
| miR-3473a    | 0.0 | 1.0  | 0.0 | 0.0 | -0.5 |
| miR-708-3p   | 0.0 | 8.0  | 7.9 | 0.0 | -0.1 |
| miR-144-5p   | 0.0 | 0.0  | 0.0 | 0.0 | 0.0  |
| miR-155-5p   | 0.0 | 0.0  | 0.0 | 0.0 | 0.0  |
| miR-183-5p   | 0.0 | 0.0  | 0.0 | 0.0 | 0.0  |
| miR-19b-3p   | 0.0 | 0.0  | 0.0 | 0.0 | 0.0  |
| miR-200b-5p  | 0.0 | 0.0  | 0.0 | 0.0 | 0.0  |
| miR-206-3p   | 0.0 | 0.0  | 0.0 | 0.0 | 0.0  |
| miR-216a-5p  | 0.0 | 0.0  | 0.0 | 0.0 | 0.0  |
| miR-299a-3p  | 0.0 | 0.0  | 0.0 | 0.0 | 0.0  |
| miR-299a-5p  | 0.0 | 0.0  | 0.0 | 0.0 | 0.0  |
| miR-29c-3p   | 0.0 | 0.0  | 0.0 | 0.0 | 0.0  |

|              |       |       |       |       |     |
|--------------|-------|-------|-------|-------|-----|
| miR-326-3p   | 0.0   | 0.0   | 0.0   | 0.0   | 0.0 |
| miR-34b-3p   | 0.0   | 0.0   | 0.0   | 0.0   | 0.0 |
| miR-429-3p   | 0.0   | 0.0   | 0.0   | 0.0   | 0.0 |
| miR-491-5p   | 0.0   | 0.0   | 0.0   | 0.0   | 0.0 |
| miR-496a-3p  | 0.0   | 0.0   | 0.0   | 0.0   | 0.0 |
| miR-540-3p   | 0.0   | 0.0   | 0.0   | 0.0   | 0.0 |
| miR-543-5p   | 0.0   | 0.0   | 0.0   | 0.0   | 0.0 |
| miR-547-3p   | 0.0   | 0.0   | 0.0   | 0.0   | 0.0 |
| miR-671-5p   | 0.0   | 0.0   | 0.0   | 0.0   | 0.0 |
| miR-674-5p   | 0.0   | 0.0   | 0.0   | 0.0   | 0.0 |
| miR-96-5p    | 0.0   | 0.0   | 0.0   | 0.0   | 0.0 |
| miR-672-5p   | 0.0   | 6.3   | 0.0   | 6.7   | 0.2 |
| miR-669a-5p  | 2.7   | 0.0   | 4.3   | 0.0   | 0.8 |
| miR-3473b    | 0.0   | 2.9   | 4.7   | 0.0   | 0.9 |
| miR-3473e    | 0.0   | 2.9   | 4.7   | 0.0   | 0.9 |
| miR-150-5p   | 7.2   | 2.9   | 12.7  | 0.0   | 1.3 |
| miR-5100     | 0.0   | 2.9   | 0.0   | 5.6   | 1.3 |
| miR-497a-5p  | 6.0   | 0.0   | 0.0   | 8.9   | 1.5 |
| miR-30d-3p   | 0.0   | 3.4   | 0.0   | 6.7   | 1.6 |
| miR-122-5p   | 0.0   | 13.7  | 9.5   | 7.8   | 1.8 |
| miR-345-3p   | 0.0   | 4.0   | 0.0   | 7.8   | 1.9 |
| miR-27b-5p   | 0.0   | 6.9   | 11.1  | 0.0   | 2.1 |
| miR-132-5p   | 0.0   | 7.4   | 0.0   | 12.2  | 2.4 |
| miR-193a-5p  | 0.0   | 0.0   | 0.0   | 6.7   | 3.3 |
| miR-488-3p   | 0.0   | 0.0   | 0.0   | 6.7   | 3.3 |
| miR-495-3p   | 0.0   | 0.0   | 0.0   | 6.7   | 3.3 |
| miR-125a-3p  | 47.8  | 45.8  | 50.6  | 50.0  | 3.5 |
| miR-652-3p   | 182.9 | 212.4 | 196.1 | 206.7 | 3.7 |
| miR-29c-5p   | 0.0   | 0.0   | 0.0   | 7.8   | 3.9 |
| miR-700-5p   | 0.0   | 0.0   | 7.9   | 0.0   | 4.0 |
| miR-186-5p   | 210.4 | 214.1 | 218.2 | 214.5 | 4.1 |
| miR-494-3p   | 0.0   | 3.4   | 0.0   | 12.2  | 4.4 |
| miR-378a-5p  | 0.0   | 0.0   | 0.0   | 8.9   | 4.4 |
| miR-337-5p   | 0.0   | 6.9   | 9.5   | 6.7   | 4.6 |
| miR-29b-2-5p | 0.0   | 0.0   | 9.5   | 0.0   | 4.7 |
| miR-592-5p   | 0.0   | 0.0   | 9.5   | 0.0   | 4.7 |
| miR-340-5p   | 8.4   | 10.9  | 12.7  | 16.7  | 5.0 |
| let-7e-3p    | 0.0   | 4.0   | 9.5   | 5.6   | 5.5 |
| let-7f-3p    | 0.0   | 6.3   | 11.1  | 7.8   | 6.3 |
| miR-30c-3p   | 6.0   | 28.6  | 19.0  | 30.0  | 7.2 |
| miR-384-5p   | 0.0   | 3.4   | 12.7  | 5.6   | 7.4 |
| miR-543-3p   | 15.5  | 16.6  | 23.7  | 23.3  | 7.5 |
| miR-29b-3p   | 0.0   | 0.0   | 5.5   | 9.4   | 7.5 |
| miR-433-3p   | 26.3  | 34.4  | 52.2  | 24.4  | 8.0 |
| miR-872-3p   | 0.0   | 18.9  | 19.0  | 16.7  | 8.4 |

|             |        |        |        |        |      |
|-------------|--------|--------|--------|--------|------|
| miR-450a-5p | 21.5   | 62.7   | 45.1   | 56.1   | 8.5  |
| miR-1249-3p | 0.0    | 14.9   | 19.0   | 14.4   | 9.3  |
| miR-1198-5p | 0.0    | 3.4    | 11.1   | 12.2   | 9.9  |
| miR-218-5p  | 0.0    | 7.2    | 14.2   | 13.3   | 10.2 |
| miR-142a-5p | 0.0    | 7.4    | 9.5    | 20.0   | 11.0 |
| miR-107-3p  | 0.0    | 3.4    | 0.0    | 25.6   | 11.1 |
| miR-425-5p  | 6.0    | 17.8   | 17.4   | 28.9   | 11.3 |
| miR-3068-5p | 9.6    | 27.5   | 30.0   | 32.2   | 12.6 |
| miR-382-5p  | 108.8  | 56.1   | 99.6   | 92.2   | 13.5 |
| miR-340-3p  | 7.2    | 14.9   | 26.9   | 23.3   | 14.1 |
| miR-485-5p  | 0.0    | 0.0    | 9.5    | 18.9   | 14.2 |
| miR-329-5p  | 0.0    | 0.0    | 7.9    | 22.2   | 15.1 |
| miR-322-5p  | 0.0    | 0.0    | 19.0   | 13.3   | 16.2 |
| miR-330-3p  | 20.3   | 42.9   | 45.9   | 50.0   | 16.3 |
| miR-338-3p  | 0.0    | 0.0    | 22.1   | 11.1   | 16.6 |
| miR-129-5p  | 4.8    | 7.7    | 33.2   | 15.0   | 17.9 |
| miR-34c-5p  | 25.1   | 19.5   | 52.2   | 28.9   | 18.3 |
| miR-1981-5p | 0.0    | 0.0    | 20.6   | 16.7   | 18.6 |
| miR-24-2-5p | 9.6    | 29.8   | 34.8   | 42.2   | 18.8 |
| miR-872-5p  | 0.0    | 27.5   | 34.8   | 32.2   | 19.8 |
| miR-338-5p  | 19.1   | 11.5   | 33.2   | 47.8   | 25.2 |
| miR-351-3p  | 21.5   | 54.4   | 71.2   | 61.1   | 28.2 |
| miR-28a-3p  | 40.6   | 80.2   | 91.7   | 91.1   | 31.0 |
| miR-490-3p  | 7.2    | 73.9   | 55.4   | 91.1   | 32.7 |
| miR-374c-5p | 19.1   | 16.0   | 53.8   | 53.3   | 36.0 |
| miR-130a-3p | 15.5   | 4.0    | 45.9   | 46.7   | 36.5 |
| let-7a-1-3p | 4.2    | 9.7    | 42.7   | 44.5   | 36.6 |
| miR-542-3p  | 0.0    | 6.3    | 36.4   | 46.7   | 38.4 |
| miR-224-5p  | 206.8  | 300.0  | 283.1  | 303.4  | 39.8 |
| miR-10a-3p  | 0.0    | 18.3   | 44.3   | 54.5   | 40.2 |
| miR-378d    | 0.0    | 10.0   | 41.9   | 53.9   | 42.9 |
| miR-30a-5p  | 880.9  | 1354.2 | 1149.7 | 1176.9 | 45.8 |
| miR-103-3p  | 142.8  | 120.2  | 174.7  | 181.1  | 46.4 |
| miR-185-5p  | 29.9   | 51.5   | 71.2   | 106.7  | 48.2 |
| miR-1839-5p | 20.3   | 47.0   | 50.6   | 118.9  | 51.1 |
| miR-181d-5p | 99.2   | 78.4   | 177.1  | 104.5  | 52.0 |
| miR-744-5p  | 69.3   | 80.7   | 137.6  | 121.1  | 54.3 |
| miR-378a-3p | 548.0  | 1749.8 | 1133.1 | 1276.4 | 55.8 |
| let-7b-3p   | 21.5   | 22.3   | 94.9   | 75.6   | 63.3 |
| let-7d-3p   | 125.5  | 254.8  | 268.8  | 241.2  | 64.8 |
| miR-139-5p  | 121.9  | 65.3   | 169.2  | 167.8  | 74.9 |
| miR-133a-3p | 21.5   | 34.3   | 86.2   | 129.5  | 79.9 |
| miR-664-3p  | 25.1   | 5.2    | 106.0  | 101.1  | 88.4 |
| miR-15b-5p  | 16.7   | 34.9   | 115.4  | 117.8  | 90.8 |
| miR-24-3p   | 1642.3 | 812.8  | 1337.9 | 1315.8 | 99.3 |



|             |        |        |         |         |         |
|-------------|--------|--------|---------|---------|---------|
| miR-221-3p  | 70.5   | 14.3   | 166.1   | 123.4   | 102.3   |
| miR-423-5p  | 554.6  | 498.2  | 667.4   | 597.9   | 106.2   |
| miR-708-5p  | 34.7   | 64.7   | 158.1   | 161.1   | 110.0   |
| let-7j      | 378.3  | 282.3  | 497.4   | 418.4   | 127.6   |
| miR-328-3p  | 82.5   | 95.0   | 232.5   | 201.2   | 128.0   |
| miR-129-3p  | 0.0    | 29.2   | 177.1   | 128.9   | 138.4   |
| miR-320-3p  | 176.9  | 121.4  | 302.1   | 306.7   | 155.2   |
| miR-16-5p   | 152.4  | 99.9   | 282.3   | 283.4   | 156.7   |
| miR-361-5p  | 138.7  | 166.6  | 281.5   | 352.3   | 164.3   |
| miR-7a-5p   | 72.3   | 47.0   | 240.4   | 236.7   | 178.9   |
| miR-30e-3p  | 29.9   | 79.6   | 237.2   | 260.6   | 194.2   |
| miR-365-3p  | 77.7   | 169.8  | 234.1   | 424.0   | 205.3   |
| miR-98-5p   | 87.3   | 180.9  | 332.1   | 372.3   | 218.1   |
| miR-29a-3p  | 163.8  | 217.6  | 457.0   | 423.4   | 249.6   |
| miR-335-5p  | 199.6  | 91.6   | 392.2   | 452.3   | 276.6   |
| miR-30a-3p  | 49.0   | 144.9  | 379.5   | 400.6   | 293.2   |
| miR-7b-5p   | 124.3  | 111.1  | 442.8   | 423.4   | 315.4   |
| miR-455-3p  | 175.7  | 234.2  | 512.4   | 663.5   | 383.0   |
| miR-30d-5p  | 1436.7 | 1019.8 | 1764.9  | 1601.4  | 454.9   |
| miR-146a-5p | 192.4  | 399.1  | 786.0   | 1023.5  | 609.0   |
| miR-30b-5p  | 66.9   | 114.5  | 838.2   | 740.1   | 698.4   |
| miR-143-5p  | 279.7  | 463.8  | 950.4   | 1373.6  | 790.3   |
| miR-26b-5p  | 187.7  | 218.0  | 1208.2  | 1165.0  | 983.8   |
| miR-23b-3p  | 1840.1 | 1523.1 | 2422.8  | 2931.7  | 995.6   |
| miR-30e-5p  | 388.5  | 795.3  | 1654.2  | 1688.1  | 1079.3  |
| let-7i-5p   | 1850.9 | 2589.5 | 4329.2  | 3510.1  | 1699.4  |
| let-7b-5p   | 4651.4 | 3523.2 | 6834.5  | 5361.6  | 2010.7  |
| miR-26a-5p  | 7743.0 | 7815.9 | 9871.3  | 9807.8  | 2060.1  |
| miR-23a-3p  | 1470.8 | 788.5  | 3025.3  | 3546.2  | 2156.1  |
| miR-30c-5p  | 577.3  | 644.2  | 4022.4  | 4096.4  | 3448.6  |
| let-7a-5p   | 6110.2 | 8602.1 | 10787.3 | 11192.5 | 3633.8  |
| let-7d-5p   | 1695.3 | 2154.6 | 6216.6  | 6043.4  | 4205.0  |
| let-7g-5p   | 2589.5 | 3695.5 | 7371.1  | 7998.5  | 4542.3  |
| let-7c-5p   | 6305.1 | 5867.0 | 12948.8 | 12437.4 | 6607.1  |
| miR-145a-5p | 3563.1 | 6025.9 | 67932.3 | 91840.1 | 75091.7 |

**Supplementary Table 2.** Clinical characterization of patients with idiopathic and/or diabetic gastroparesis

| Parameters                   | Healthy (n=18) | Idiopathic gastroparesis (n=14) | Diabetic gastroparesis (n=2) |
|------------------------------|----------------|---------------------------------|------------------------------|
| Age (mean ± SEM)             | 45.1 ± 14.2    | 39.2 ± 3.56                     | 60.2 ± 14.2                  |
| Gender (M:F)                 | 0.39:0.61      | 0.22:0.78                       | 1:1                          |
| BMI                          | 26.9 ± 4.56    | 25.6 ± 1.1                      | 24.6 ± 3.06                  |
| GES %2hr                     | -              | 59 ± 5                          | 39.6 ± 7                     |
| GES %4hr                     | -              | 32 ± 5                          | 15 ± 4                       |
| A1C                          | 5.6 ± 0.83     | 5.2 ± 0.06                      | 8.4 ± 2.16                   |
| Scoring Abdominal pain (0-5) | 0              | 2.3 ± 1.2                       | -                            |
| GCSI-dd Aggregate            | -              | 2.3 ± 0.18                      | -                            |
| GCSI-dd Nausea/Vomit         | -              | 1.09 ± 0.16                     | -                            |
| GCSI-dd Fullness/Satiety     | -              | 3.10 ± 0.22                     | -                            |
| GCSI-dd Bloating/Abd pain    | -              | 2.43 ± 0.32                     | -                            |

**Supplementary Table 3.** Expression levels of miRNAs in blood plasma samples collected from healthy control subjects (HC, n=2), idiopathic gastroparesis high insulin patients (IG-H, n=2), idiopathic gastroparesis low insulin patients (IG-L, n=2), and diabetic gastroparesis patients (DG, n=2) obtained by miRNA-seq

| miRNA Name    | Normalized Reads (Number) |          |          |          |           |          |           |           | Change of Reads (Number) |           |           |           |           |           |           |           |
|---------------|---------------------------|----------|----------|----------|-----------|----------|-----------|-----------|--------------------------|-----------|-----------|-----------|-----------|-----------|-----------|-----------|
|               | HC1                       | HC2      | IG-H1    | IG-H2    | IG-L1     | IG-L2    | DG1       | DG2       | HC1                      | HC2       | IG-H1     | IG-H2     | IG-L1     | IG-L2     | DG1       | DG2       |
| let-7a-2-3p   | 0.0                       | 0.0      | 0.0      | 0.0      | 0.0       | 5.9      | 0.0       | 0.0       | 0.0                      | 0.0       | 0.0       | 0.0       | 0.0       | 5.9       | 0.0       | 0.0       |
| let-7a-3p     | 1752.5                    | 2189.0   | 1345.6   | 1687.3   | 1362.4    | 1761.4   | 1289.2    | 1530.5    | -218.2                   | 218.2     | -625.2    | -283.5    | -608.4    | -209.4    | -681.6    | -440.3    |
| let-7a-5p     | 12089.7                   | 11115.5  | 17102.2  | 13988.6  | 19944.5   | 14468.3  | 20675.0   | 23350.8   | 487.1                    | -487.1    | 5499.6    | 2386.1    | 8341.9    | 2865.7    | 9072.4    | 11748.2   |
| let-7b-3p     | 350.6                     | 429.0    | 345.2    | 375.1    | 336.8     | 421.0    | 319.2     | 329.9     | -39.2                    | 39.2      | -44.6     | -14.7     | -53.0     | 31.2      | -70.6     | -59.9     |
| let-7b-5p     | 6543.2                    | 6724.5   | 12581.4  | 7582.7   | 14706.2   | 11874.2  | 15930.8   | 17532.7   | -90.7                    | 90.7      | 5947.5    | 948.8     | 8072.4    | 5240.3    | 9296.9    | 10898.8   |
| let-7c-3p     | 35.7                      | 51.0     | 27.9     | 44.1     | 26.6      | 22.9     | 32.8      | 26.2      | -7.6                     | 7.6       | -15.4     | 0.7       | -16.8     | -20.5     | -10.6     | -17.2     |
| let-7c-5p     | 6271.2                    | 5275.5   | 7664.9   | 7165.1   | 8875.9    | 6660.9   | 9170.3    | 10502.0   | 497.8                    | -497.8    | 1891.6    | 1391.8    | 3102.6    | 887.6     | 3397.0    | 4728.7    |
| let-7d-3p     | 1559.1                    | 2152.9   | 2627.1   | 1429.1   | 2671.9    | 2976.4   | 2739.7    | 2760.2    | -296.9                   | 296.9     | 771.0     | -426.9    | 815.9     | 1120.4    | 883.7     | 904.2     |
| let-7d-5p     | 7099.3                    | 7232.9   | 9813.1   | 7820.4   | 11855.4   | 8845.5   | 11380.9   | 12029.0   | -66.8                    | 66.8      | 2647.0    | 654.3     | 4689.3    | 1679.4    | 4214.8    | 4862.9    |
| let-7e-3p     | 79.7                      | 88.0     | 48.9     | 50.8     | 38.6      | 42.1     | 27.8      | 39.8      | -4.1                     | 4.1       | -35.0     | -33.0     | -45.3     | -41.8     | -56.0     | -44.1     |
| let-7e-5p     | 753.2                     | 660.6    | 1340.7   | 856.5    | 1451.1    | 1049.5   | 1546.9    | 1667.7    | 46.3                     | -46.3     | 633.8     | 149.6     | 744.2     | 342.6     | 840.0     | 960.8     |
| let-7f-1-3p   | 136.1                     | 121.0    | 183.6    | 113.0    | 176.5     | 202.4    | 186.0     | 224.1     | 7.6                      | -7.6      | 55.0      | -15.6     | 48.0      | 73.8      | 57.4      | 95.6      |
| let-7f-2-3p   | 582.5                     | 676.1    | 507.0    | 532.7    | 556.0     | 622.2    | 523.4     | 512.3     | -46.8                    | 46.8      | -122.3    | -96.6     | -73.3     | -7.1      | -105.9    | -117.0    |
| let-7f-5p     | 31068.5                   | 28211.6  | 68777.4  | 34764.5  | 78646.6   | 55069.0  | 75967.3   | 84434.8   | 1428.5                   | -1428.5   | 39137.4   | 5124.4    | 49006.6   | 25429.0   | 46327.2   | 54794.7   |
| let-7g-3p     | 17.9                      | 20.0     | 229.5    | 16.9     | 290.5     | 259.2    | 294.4     | 286.2     | -1.1                     | 1.1       | 210.5     | -2.0      | 271.6     | 240.3     | 275.4     | 267.3     |
| let-7g-5p     | 90168.8                   | 79510.2  | 210846.5 | 91764.8  | 258706.0  | 160957.6 | 230958.4  | 302196.1  | 5329.3                   | -5329.3   | 126007.0  | 6925.3    | 173866.5  | 76118.1   | 146118.9  | 217356.6  |
| let-7i-3p     | 126.5                     | 172.0    | 344.2    | 139.0    | 386.5     | 394.4    | 422.6     | 365.8     | -22.7                    | 22.7      | 195.0     | -10.3     | 237.2     | 245.1     | 273.4     | 216.5     |
| let-7i-5p     | 30357.2                   | 28285.4  | 48164.6  | 32001.4  | 52168.0   | 38300.9  | 48649.1   | 62525.1   | 1035.9                   | -1035.9   | 18843.3   | 2680.0    | 22846.7   | 8979.6    | 19327.7   | 33203.7   |
| miR-1-3p      | 1197568.1                 | 786538.6 | 544298.3 | 782369.2 | 266289.8  | 208702.3 | 255561.2  | 305468.6  | 205514.7                 | -205514.7 | -447755.0 | -209684.2 | -725763.6 | -783351.1 | -736492.1 | -686584.7 |
| miR-1-5p      | 23.4                      | 18.0     | 57.9     | 24.9     | 24.9      | 34.7     | 26.9      | 30.1      | 2.7                      | -2.7      | 37.2      | 4.2       | 4.2       | 14.0      | 6.2       | 9.4       |
| miR-100-5p    | 11820.1                   | 10682.9  | 4612.6   | 9384.3   | 5298.8    | 3783.2   | 4314.0    | 4149.5    | 568.6                    | -568.6    | -6638.9   | -1867.2   | -5952.7   | -7468.3   | -6937.5   | -7101.9   |
| miR-101-3p    | 34885.5                   | 31625.8  | 66706.2  | 36575.7  | 83171.2   | 83505.1  | 98553.1   | 81364.9   | 1629.9                   | -1629.9   | 33450.6   | 3320.1    | 49915.6   | 50249.5   | 65297.5   | 48109.3   |
| miR-101-5p    | 0.0                       | 10.0     | 52.9     | 18.1     | 53.1      | 95.3     | 76.6      | 40.7      | -5.0                     | 5.0       | 47.9      | 13.1      | 48.1      | 90.3      | 71.6      | 35.7      |
| miR-103a-2-5p | 0.0                       | 0.0      | 0.0      | 5.6      | 5.1       | 7.4      | 10.9      | 0.0       | 0.0                      | 0.0       | 0.0       | 5.6       | 5.1       | 7.4       | 10.9      | 0.0       |
| miR-103a-3p   | 8471.0                    | 7319.3   | 3194.1   | 8422.3   | 3142.8    | 3417.8   | 3254.5    | 3607.4    | 575.9                    | -575.9    | -4701.0   | 527.2     | -4752.4   | -4477.4   | -4640.6   | -4287.8   |
| miR-106a-5p   | 2675.8                    | 2470.4   | 2369.8   | 2958.1   | 2303.4    | 2558.0   | 2347.9    | 2400.6    | 102.7                    | -102.7    | -203.3    | 385.0     | -269.7    | -15.1     | -225.2    | -172.5    |
| miR-106b-3p   | 794.7                     | 735.0    | 171.6    | 644.0    | 136.3     | 177.3    | 150.2     | 145.5     | 29.9                     | -29.9     | -593.2    | -120.9    | -628.6    | -587.6    | -614.7    | -619.3    |
| miR-106b-5p   | 4524.8                    | 4132.8   | 6147.1   | 4617.3   | 5720.8    | 6206.1   | 6688.7    | 5386.6    | 196.0                    | -196.0    | 1818.3    | 288.5     | 1392.0    | 1877.3    | 2360.0    | 1057.8    |
| miR-107       | 2430.4                    | 2485.5   | 1690.5   | 2445.9   | 1985.5    | 1985.0   | 1919.0    | 2031.3    | -27.6                    | 27.6      | -767.4    | -12.0     | -472.5    | -473.0    | -539.0    | -426.7    |
| miR-10a-3p    | 237.9                     | 279.0    | 249.4    | 223.7    | 189.4     | 199.4    | 239.7     | 184.3     | -20.6                    | 20.6      | -9.0      | -34.7     | -69.0     | -59.0     | -18.8     | -74.1     |
| miR-10a-5p    | 42542.3                   | 39025.9  | 22461.2  | 32946.4  | 21720.5   | 20410.6  | 21483.4   | 31341.4   | 1758.2                   | -1758.2   | -18322.9  | -7837.7   | -19063.6  | -20373.5  | -19300.7  | -9442.7   |
| miR-10b-3p    | 33.0                      | 23.0     | 0.0      | 35.0     | 0.0       | 0.0      | 0.0       | 0.0       | 5.0                      | -5.0      | -28.0     | 7.0       | -28.0     | -28.0     | -28.0     | -28.0     |
| miR-10b-5p    | 6235.2                    | 5992.7   | 2620.1   | 4961.3   | 1028.3    | 1109.3   | 1079.0    | 1592.1    | 121.3                    | -121.3    | -3493.9   | -1152.6   | -5085.6   | -5004.6   | -5034.9   | -4521.8   |
| miR-1180-3p   | 6.9                       | 0.0      | 0.0      | 0.0      | 0.0       | 0.0      | 0.0       | 0.0       | 3.4                      | -3.4      | -3.4      | -3.4      | -3.4      | -3.4      | -3.4      | -3.4      |
| miR-1197      | 0.0                       | 0.0      | 0.0      | 0.0      | 4.3       | 0.0      | 0.0       | 0.0       | 0.0                      | 0.0       | 0.0       | 0.0       | 4.3       | 0.0       | 0.0       | 0.0       |
| miR-122-3p    | 1905.6                    | 1985.9   | 1482.6   | 2033.6   | 2904.1    | 3082.0   | 3190.2    | 2473.0    | -40.1                    | 40.1      | -463.1    | 87.8      | 958.4     | 1136.2    | 1244.5    | 527.3     |
| miR-122-5p    | 153765.4                  | 143244.1 | 868373.1 | 154302.7 | 1206260.9 | 917617.7 | 1158388.6 | 1454197.6 | 5260.6                   | -5260.6   | 719868.4  | 5798.0    | 1057756.1 | 769113.0  | 1009883.9 | 1305692.9 |
| miR-124-3p    | 5.0                       | 15.7     | 30.9     | 22.2     | 42.0      | 42.3     | 44.1      | 40.1      | -5.3                     | 5.3       | 20.6      | 11.9      | 31.6      | 32.0      | 33.7      | 29.7      |
| miR-1247-3p   | 0.0                       | 0.0      | 0.0      | 0.0      | 4.3       | 3.7      | 0.0       | 0.0       | 0.0                      | 0.0       | 0.0       | 0.0       | 4.3       | 3.7       | 0.0       | 0.0       |

|               |          |          |          |          |          |          |          |          |         |          |          |         |          |          |          |          |
|---------------|----------|----------|----------|----------|----------|----------|----------|----------|---------|----------|----------|---------|----------|----------|----------|----------|
| miR-1247-5p   | 0.0      | 0.0      | 5.0      | 0.0      | 6.0      | 4.4      | 5.0      | 0.0      | 0.0     | 0.0      | 5.0      | 0.0     | 6.0      | 4.4      | 5.0      | 0.0      |
| miR-1248      | 160.9    | 159.0    | 45.9     | 212.4    | 34.3     | 82.7     | 35.8     | 25.2     | 0.9     | -0.9     | -114.0   | 52.5    | -125.7   | -77.2    | -124.1   | -134.7   |
| miR-1249-3p   | 24.7     | 25.0     | 74.8     | 23.7     | 89.1     | 112.3    | 113.4    | 98.0     | -0.1    | 0.1      | 50.0     | -1.1    | 64.2     | 87.4     | 88.5     | 73.1     |
| miR-125a-3p   | 20.6     | 17.0     | 33.9     | 31.6     | 29.1     | 23.6     | 33.8     | 22.3     | 1.8     | -1.8     | 15.1     | 12.8    | 10.3     | 4.8      | 15.0     | 3.5      |
| miR-125a-5p   | 5939.6   | 7244.6   | 1809.9   | 5198.0   | 1719.0   | 2001.5   | 1888.5   | 1694.0   | -652.5  | 652.5    | -4782.2  | -1394.1 | -4873.1  | -4590.6  | -4703.6  | -4898.1  |
| miR-125b-1-3p | 133.4    | 149.0    | 68.8     | 88.1     | 52.3     | 40.6     | 45.7     | 68.9     | -7.8    | 7.8      | -72.3    | -53.1   | -88.9    | -100.6   | -95.4    | -72.3    |
| miR-125b-5p   | 20211.1  | 19924.9  | 3171.3   | 13522.0  | 2917.0   | 3264.4   | 3099.7   | 2533.2   | 143.1   | -143.1   | -16896.7 | -6546.0 | -17151.0 | -16803.6 | -16968.3 | -17534.8 |
| miR-126-3p    | 157428.1 | 134624.6 | 144720.9 | 139821.6 | 134260.7 | 117966.7 | 138335.6 | 133138.7 | 11401.8 | -11401.8 | -1305.5  | -6204.8 | -11765.6 | -28059.7 | -7690.8  | -12887.7 |
| miR-126-5p    | 31470.2  | 33763.1  | 48247.9  | 31306.6  | 48345.2  | 46626.3  | 49743.0  | 41700.2  | -1146.5 | 1146.5   | 15631.3  | -1310.1 | 15728.6  | 14009.6  | 17126.3  | 9083.5   |
| miR-1260a     | 419.3    | 309.0    | 108.8    | 641.1    | 109.7    | 96.4     | 109.4    | 34.0     | 55.2    | -55.2    | -255.4   | 277.0   | -254.5   | -267.8   | -254.8   | -330.2   |
| miR-1260b     | 881.3    | 614.0    | 163.6    | 718.0    | 132.0    | 146.6    | 152.2    | 71.8     | 133.7   | -133.7   | -584.0   | -29.7   | -615.7   | -601.0   | -595.5   | -675.8   |
| miR-1268a     | 19.9     | 41.5     | 3.0      | 27.7     | 0.0      | 8.5      | 5.0      | 0.0      | -10.8   | 10.8     | -27.7    | -3.0    | -30.7    | -22.2    | -25.7    | -30.7    |
| miR-1268b     | 6.2      | 5.5      | 3.0      | 5.1      | 0.0      | 2.6      | 0.0      | 0.0      | 0.3     | -0.3     | -2.9     | -0.8    | -5.8     | -3.3     | -5.8     | -5.8     |
| miR-127-3p    | 1467.0   | 1569.9   | 1039.6   | 1229.2   | 984.6    | 993.4    | 915.9    | 934.3    | -51.4   | 51.4     | -478.8   | -289.3  | -533.9   | -525.1   | -602.6   | -584.2   |
| miR-127-5p    | 127.9    | 128.0    | 186.6    | 149.1    | 229.7    | 240.0    | 189.9    | 195.0    | -0.1    | 0.1      | 58.6     | 21.2    | 101.7    | 112.1    | 62.0     | 67.1     |
| miR-128-1-5p  | 0.0      | 13.0     | 9.0      | 11.3     | 0.0      | 0.0      | 0.0      | 0.0      | -6.5    | 6.5      | 2.5      | 4.8     | -6.5     | -6.5     | -6.5     | -6.5     |
| miR-128-3p    | 134.1    | 148.0    | 30.4     | 108.5    | 25.7     | 59.8     | 45.2     | 25.2     | -7.0    | 7.0      | -110.6   | -32.6   | -115.3   | -81.2    | -95.8    | -115.8   |
| miR-129-1-3p  | 20.6     | 17.0     | 11.0     | 12.4     | 17.1     | 20.7     | 34.8     | 34.9     | 1.8     | -1.8     | -7.8     | -6.4    | -1.7     | 1.9      | 16.0     | 16.1     |
| miR-129-2-3p  | 61.9     | 63.0     | 82.8     | 70.0     | 84.8     | 109.3    | 69.6     | 89.3     | -0.6    | 0.6      | 20.4     | 7.6     | 22.4     | 46.9     | 7.2      | 26.8     |
| miR-129-5p    | 16.5     | 17.5     | 20.0     | 11.3     | 32.6     | 34.0     | 17.4     | 31.0     | -0.5    | 0.5      | 3.0      | -5.7    | 15.6     | 17.0     | 0.4      | 14.0     |
| miR-1296-5p   | 30.2     | 49.0     | 14.0     | 29.4     | 0.0      | 28.8     | 19.9     | 17.5     | -9.4    | 9.4      | -25.7    | -10.2   | -39.6    | -10.8    | -19.7    | -22.2    |
| miR-1306-5p   | 22.0     | 27.0     | 5.0      | 23.7     | 0.0      | 0.0      | 0.0      | 0.0      | -2.5    | 2.5      | -19.5    | -0.8    | -24.5    | -24.5    | -24.5    | -24.5    |
| miR-130a-3p   | 1116.4   | 1211.9   | 2689.9   | 1211.1   | 3143.2   | 3115.2   | 3396.1   | 3239.5   | -47.8   | 47.8     | 1525.7   | 46.9    | 1979.0   | 1951.0   | 2231.9   | 2075.3   |
| miR-130a-5p   | 23.4     | 20.0     | 31.9     | 14.7     | 30.0     | 35.5     | 16.9     | 41.7     | 1.7     | -1.7     | 10.2     | -7.0    | 8.3      | 13.8     | -4.8     | 20.0     |
| miR-130b-3p   | 37.1     | 71.0     | 162.6    | 58.7     | 155.1    | 152.9    | 123.3    | 195.0    | -16.9   | 16.9     | 108.6    | 4.7     | 101.0    | 98.8     | 69.3     | 141.0    |
| miR-130b-5p   | 35.7     | 61.0     | 10.0     | 31.6     | 9.4      | 6.6      | 0.0      | 4.9      | -12.6   | 12.6     | -38.4    | -16.7   | -38.9    | -41.7    | -48.4    | -43.5    |
| miR-132-3p    | 129.2    | 154.0    | 192.6    | 125.4    | 216.8    | 154.4    | 206.8    | 188.2    | -12.4   | 12.4     | 50.9     | -16.2   | 75.2     | 12.7     | 65.2     | 46.6     |
| miR-132-5p    | 30.2     | 42.0     | 22.0     | 28.2     | 18.0     | 23.6     | 18.9     | 14.6     | -5.9    | 5.9      | -14.2    | -7.9    | -18.1    | -12.5    | -17.2    | -21.6    |
| miR-1323      | 0.0      | 0.0      | 0.0      | 0.0      | 0.0      | 13.3     | 0.0      | 0.0      | 0.0     | 0.0      | 0.0      | 0.0     | 0.0      | 13.3     | 0.0      | 0.0      |
| miR-133a-3p   | 9954.8   | 11043.2  | 6893.4   | 10493.5  | 3418.9   | 3690.8   | 3680.0   | 3565.6   | -544.2  | 544.2    | -3605.6  | -5.5    | -7080.2  | -6808.2  | -6819.0  | -6933.4  |
| miR-133a-5p   | 2322.9   | 2088.9   | 1628.8   | 2194.5   | 940.9    | 921.3    | 982.5    | 892.1    | 117.0   | -117.0   | -577.1   | -11.4   | -1265.0  | -1284.6  | -1223.4  | -1313.8  |
| miR-133b      | 1037.1   | 1201.3   | 984.8    | 1168.5   | 517.3    | 536.4    | 516.1    | 448.9    | -82.1   | 82.1     | -134.4   | 49.3    | -601.9   | -582.8   | -603.1   | -670.3   |
| miR-134-3p    | 0.0      | 0.0      | 0.0      | 0.0      | 4.3      | 0.0      | 0.0      | 0.0      | 0.0     | 0.0      | 0.0      | 0.0     | 4.3      | 0.0      | 0.0      | 0.0      |
| miR-134-5p    | 67.4     | 55.0     | 118.7    | 58.7     | 175.7    | 139.6    | 234.7    | 141.6    | 6.2     | -6.2     | 57.5     | -2.4    | 114.5    | 78.4     | 173.5    | 80.5     |
| miR-135a-5p   | 103.1    | 94.0     | 108.8    | 107.3    | 72.0     | 80.9     | 85.0     | 91.2     | 4.6     | -4.6     | 10.2     | 8.8     | -26.6    | -17.7    | -13.5    | -7.4     |
| miR-135b-5p   | 0.0      | 5.0      | 22.0     | 7.9      | 8.6      | 12.6     | 7.0      | 12.6     | -2.5    | 2.5      | 19.5     | 5.4     | 6.1      | 10.1     | 4.5      | 10.1     |
| miR-136-3p    | 1256.7   | 1145.9   | 1544.5   | 1023.6   | 1457.6   | 1486.0   | 1394.2   | 1392.2   | 55.4    | -55.4    | 343.2    | -177.7  | 256.3    | 284.7    | 192.9    | 190.9    |
| miR-136-5p    | 30.2     | 19.0     | 76.8     | 31.6     | 74.6     | 62.0     | 79.6     | 96.0     | 5.6     | -5.6     | 52.2     | 7.0     | 49.9     | 37.4     | 54.9     | 71.4     |
| miR-137-3p    | 258.5    | 175.0    | 695.4    | 264.4    | 867.2    | 838.3    | 886.1    | 835.3    | 41.7    | -41.7    | 478.7    | 47.6    | 650.5    | 621.5    | 669.3    | 618.6    |
| miR-137-5p    | 0.0      | 0.0      | 0.0      | 0.0      | 0.0      | 0.0      | 0.0      | 4.9      | 0.0     | 0.0      | 0.0      | 0.0     | 0.0      | 0.0      | 0.0      | 4.9      |
| miR-138-5p    | 37.8     | 32.0     | 70.8     | 23.7     | 93.8     | 99.3     | 97.0     | 92.2     | 2.9     | -2.9     | 35.9     | -11.2   | 58.9     | 64.4     | 62.1     | 57.3     |
| miR-139-3p    | 17.9     | 26.0     | 16.0     | 21.5     | 7.7      | 12.6     | 9.0      | 22.3     | -4.1    | 4.1      | -6.0     | -0.5    | -14.2    | -9.4     | -13.0    | 0.4      |
| miR-139-5p    | 1204.4   | 1335.9   | 883.0    | 1265.3   | 800.4    | 840.5    | 879.1    | 870.3    | -65.8   | 65.8     | -387.2   | -4.8    | -469.8   | -429.7   | -391.1   | -399.9   |
| miR-140-3p    | 12517.1  | 10731.4  | 9853.7   | 10492.0  | 9706.4   | 9279.2   | 9490.1   | 8783.2   | 892.9   | -892.9   | -1770.6  | -1132.3 | -1917.9  | -2345.1  | -2134.1  | -2841.1  |
| miR-140-5p    | 1080.7   | 1087.9   | 1375.9   | 1208.8   | 1300.0   | 1325.7   | 1445.9   | 1558.1   | -3.6    | 3.6      | 291.6    | 124.5   | 215.6    | 241.4    | 361.6    | 473.8    |

|             |           |           |           |           |           |           |           |           |          |           |           |           |           |            |           |           |
|-------------|-----------|-----------|-----------|-----------|-----------|-----------|-----------|-----------|----------|-----------|-----------|-----------|-----------|------------|-----------|-----------|
| miR-141-3p  | 3634.6    | 3661.8    | 5844.8    | 3741.2    | 6424.0    | 7127.4    | 7170.6    | 7615.6    | -13.6    | 13.6      | 2196.6    | 93.0      | 2775.8    | 3479.2     | 3522.4    | 3967.4    |
| miR-141-5p  | 28.9      | 28.0      | 29.9      | 29.4      | 38.6      | 46.5      | 42.8      | 34.9      | 0.4      | -0.4      | 1.5       | 0.9       | 10.1      | 18.1       | 14.3      | 6.5       |
| miR-142-3p  | 8209.6    | 7042.6    | 6140.1    | 10077.4   | 2683.0    | 2906.9    | 3237.0    | 2948.4    | 583.5    | -583.5    | -1486.0   | 2451.3    | -4943.1   | -4719.1    | -4389.1   | -4677.6   |
| miR-142-5p  | 60139.8   | 52483.1   | 41237.8   | 52009.3   | 15542.1   | 14867.1   | 14507.2   | 11501.7   | 3828.3   | -3828.3   | -15073.7  | -4302.2   | -40769.4  | -41444.4   | -41804.2  | -44809.7  |
| miR-143-3p  | 3254629.9 | 2144140.2 | 1965522.1 | 1984982.2 | 1919795.7 | 1501545.0 | 1912538.6 | 1905224.5 | 555244.8 | -555244.8 | -733862.9 | -714402.8 | -779589.3 | -1197840.0 | -786846.5 | -794160.6 |
| miR-143-5p  | 5758.1    | 4915.7    | 6652.0    | 5013.8    | 6989.1    | 6515.5    | 7356.0    | 5806.7    | 421.2    | -421.2    | 1315.0    | -323.1    | 1652.2    | 1178.6     | 2019.1    | 469.7     |
| miR-144-3p  | 6584.4    | 7065.6    | 8392.0    | 5887.1    | 6517.8    | 5488.9    | 7341.1    | 5383.6    | -240.6   | 240.6     | 1567.0    | -937.9    | -307.2    | -1336.1    | 516.1     | -1441.4   |
| miR-144-5p  | 2395.1    | 2496.9    | 2827.6    | 2874.1    | 2407.1    | 2509.6    | 2522.0    | 2730.1    | -50.9    | 50.9      | 381.6     | 428.1     | -38.9     | 63.6       | 76.0      | 284.2     |
| miR-145-3p  | 17736.3   | 18728.0   | 19253.5   | 15978.1   | 18171.1   | 17488.9   | 17177.3   | 17853.6   | -495.8   | 495.8     | 1021.3    | -2254.0   | -61.0     | -743.2     | -1054.8   | -378.5    |
| miR-145-5p  | 64517.5   | 76116.8   | 26444.2   | 66928.8   | 24927.1   | 37576.8   | 25345.8   | 28365.8   | -5799.7  | 5799.7    | -43872.9  | -3388.3   | -45390.0  | -32740.4   | -44971.3  | -41951.4  |
| miR-1469    | 1391.4    | 1944.9    | 191.6     | 1291.3    | 24.0      | 31.8      | 37.8      | 10.7      | -276.7   | 276.7     | -1476.6   | -376.8    | -1644.2   | -1636.4    | -1630.4   | -1657.5   |
| miR-146a-3p | 9.6       | 7.0       | 0.0       | 0.0       | 11.1      | 8.1       | 5.0       | 4.9       | 1.3      | -1.3      | -8.3      | -8.3      | 2.8       | -0.2       | -3.3      | -3.5      |
| miR-146a-5p | 11022.6   | 9540.5    | 13481.0   | 11019.6   | 11184.6   | 8671.3    | 10712.8   | 12704.3   | 741.1    | -741.1    | 3199.5    | 738.1     | 903.1     | -1610.2    | 431.3     | 2422.7    |
| miR-146b-5p | 1993.6    | 1697.9    | 1969.0    | 1873.1    | 1771.3    | 1403.2    | 1639.4    | 2247.5    | 147.9    | -147.9    | 123.3     | 27.4      | -74.5     | -442.5     | -206.4    | 401.7     |
| miR-147b-3p | 198.0     | 187.0     | 167.6     | 230.5     | 90.8      | 85.7      | 90.5      | 80.5      | 5.5      | -5.5      | -24.9     | 38.0      | -101.7    | -106.8     | -102.0    | -112.0    |
| miR-147b-5p | 52.2      | 56.0      | 37.9      | 59.9      | 14.6      | 35.5      | 15.9      | 10.7      | -1.9     | 1.9       | -16.2     | 5.8       | -39.6     | -18.7      | -38.2     | -43.4     |
| miR-148a-3p | 106051.3  | 116349.1  | 87320.6   | 92653.3   | 100500.4  | 94345.2   | 105292.1  | 101396.6  | -5148.9  | 5148.9    | -23879.6  | -18546.9  | -10699.8  | -16855.0   | -5908.1   | -9803.6   |
| miR-148a-5p | 662.7     | 719.0     | 718.4     | 568.3     | 781.5     | 793.9     | 788.6     | 794.6     | -28.1    | 28.1      | 27.5      | -122.6    | 90.7      | 103.1      | 97.8      | 103.8     |
| miR-148b-3p | 4407.3    | 5232.2    | 1090.0    | 4111.2    | 1115.7    | 1145.9    | 1121.8    | 1272.9    | -412.5   | 412.5     | -3729.7   | -708.6    | -3704.0   | -3673.9    | -3698.0   | -3546.8   |
| miR-148b-5p | 86.6      | 75.0      | 126.7     | 70.0      | 134.5     | 135.9     | 141.2     | 160.1     | 5.8      | -5.8      | 45.9      | -10.8     | 53.7      | 55.1       | 60.4      | 79.3      |
| miR-149-5p  | 919.8     | 978.9     | 438.0     | 829.2     | 389.9     | 369.3     | 336.1     | 273.6     | -29.6    | 29.6      | -511.4    | -120.1    | -559.5    | -580.1     | -613.3    | -675.8    |
| miR-150-3p  | 64.6      | 69.0      | 25.9      | 52.0      | 4.3       | 0.0       | 0.0       | 0.0       | -2.2     | 2.2       | -40.9     | -14.8     | -62.5     | -66.8      | -66.8     | -66.8     |
| miR-150-5p  | 4122.0    | 4508.8    | 1143.4    | 4005.0    | 405.3     | 510.3     | 407.7     | 335.7     | -193.4   | 193.4     | -3171.9   | -310.4    | -3910.0   | -3805.0    | -3907.6   | -3979.7   |
| miR-151a-3p | 607.7     | 668.0     | 845.1     | 555.8     | 960.6     | 915.1     | 894.0     | 948.9     | -30.1    | 30.1      | 207.3     | -82.0     | 322.8     | 277.2      | 256.2     | 311.0     |
| miR-151b    | 7843.2    | 7174.6    | 3100.0    | 7094.8    | 2646.2    | 2660.6    | 2878.0    | 2330.4    | 334.3    | -334.3    | -4408.9   | -414.0    | -4862.7   | -4848.2    | -4630.9   | -5178.5   |
| miR-152-3p  | 26403.7   | 22342.8   | 25365.2   | 24146.2   | 29916.2   | 31194.2   | 32099.7   | 26861.9   | 2030.5   | -2030.5   | 991.9     | -227.0    | 5542.9    | 6821.0     | 7726.5    | 2488.7    |
| miR-152-5p  | 112.7     | 79.0      | 115.7     | 53.1      | 174.8     | 181.7     | 113.4     | 235.8     | 16.9     | -16.9     | 19.9      | -42.8     | 78.9      | 85.8       | 17.5      | 139.9     |
| miR-153-3p  | 22.0      | 26.5      | 77.3      | 18.1      | 94.7      | 91.9      | 92.5      | 87.8      | -2.3     | 2.3       | 53.1      | -6.2      | 70.4      | 67.7       | 68.2      | 63.6      |
| miR-154-3p  | 6.9       | 21.0      | 20.0      | 21.5      | 26.6      | 40.6      | 21.9      | 27.2      | -7.1     | 7.1       | 6.0       | 7.5       | 12.6      | 26.7       | 7.9       | 13.2      |
| miR-154-5p  | 19.2      | 28.0      | 27.9      | 27.1      | 54.0      | 45.8      | 41.8      | 35.9      | -4.4     | 4.4       | 4.3       | 3.5       | 30.4      | 22.2       | 18.1      | 12.3      |
| miR-15a-3p  | 119.6     | 103.0     | 140.7     | 82.5      | 162.0     | 168.4     | 132.3     | 147.5     | 8.3      | -8.3      | 29.4      | -28.8     | 50.7      | 57.1       | 21.0      | 36.2      |
| miR-15a-5p  | 1324.0    | 1097.9    | 1212.3    | 1555.7    | 1575.0    | 1520.7    | 1977.0    | 1653.2    | 113.0    | -113.0    | 1.3       | 344.7     | 364.0     | 309.7      | 766.0     | 442.2     |
| miR-15b-3p  | 382.2     | 477.0     | 176.6     | 488.1     | 205.7     | 195.0     | 171.0     | 143.6     | -47.4    | 47.4      | -253.0    | 58.5      | -223.9    | -234.6     | -258.6    | -286.0    |
| miR-15b-5p  | 1209.9    | 1417.9    | 145.7     | 1282.3    | 207.4     | 211.2     | 240.7     | 177.5     | -104.0   | 104.0     | -1168.2   | -31.7     | -1106.5   | -1102.7    | -1073.3   | -1136.4   |
| miR-16-3p   | 427.6     | 408.0     | 478.9     | 439.5     | 496.2     | 536.2     | 517.1     | 492.9     | 9.8      | -9.8      | 61.1      | 21.7      | 78.4      | 118.4      | 99.3      | 75.1      |
| miR-16-5p   | 12678.7   | 10790.9   | 8946.8    | 14095.4   | 9349.1    | 10471.2   | 10395.1   | 10481.6   | 943.9    | -943.9    | -2788.0   | 2360.6    | -2385.7   | -1263.6    | -1339.7   | -1253.2   |
| miR-17-3p   | 228.2     | 283.0     | 152.7     | 198.8     | 156.0     | 186.1     | 160.1     | 140.7     | -27.4    | 27.4      | -103.0    | -56.8     | -99.6     | -69.5      | -95.5     | -114.9    |
| miR-17-5p   | 2675.8    | 2470.4    | 2369.8    | 2958.1    | 2303.4    | 2558.0    | 2347.9    | 2400.6    | 102.7    | -102.7    | -203.3    | 385.0     | -269.7    | -15.1      | -225.2    | -172.5    |
| miR-181a-3p | 231.0     | 254.0     | 125.7     | 188.7     | 113.1     | 136.6     | 109.4     | 114.5     | -11.5    | 11.5      | -116.8    | -53.8     | -129.4    | -105.9     | -133.1    | -128.0    |
| miR-181a-5p | 1418.9    | 1430.4    | 264.4     | 1469.2    | 193.2     | 255.5     | 193.4     | 210.0     | -5.8     | 5.8       | -1160.3   | 44.6      | -1231.4   | -1169.1    | -1231.2   | -1214.6   |
| miR-181b-3p | 0.0       | 11.0      | 0.0       | 9.0       | 0.0       | 0.0       | 0.0       | 0.0       | -5.5     | 5.5       | -5.5      | 3.5       | -5.5      | -5.5       | -5.5      | -5.5      |
| miR-181b-5p | 305.0     | 287.5     | 179.1     | 320.8     | 129.4     | 147.7     | 140.2     | 148.4     | 8.8      | -8.8      | -117.1    | 24.6      | -166.8    | -148.5     | -156.0    | -147.8    |
| miR-181c-3p | 187.0     | 146.0     | 40.9      | 113.0     | 16.3      | 28.1      | 27.8      | 27.2      | 20.5     | -20.5     | -125.6    | -53.5     | -150.2    | -138.4     | -138.6    | -139.3    |
| miR-181c-5p | 503.2     | 534.0     | 472.9     | 464.3     | 399.3     | 435.0     | 385.9     | 359.0     | -15.4    | 15.4      | -45.7     | -54.3     | -119.3    | -83.6      | -132.7    | -159.6    |
| miR-181d-5p | 162.7     | 198.0     | 34.9      | 188.1     | 31.7      | 40.6      | 34.8      | 36.9      | -17.6    | 17.6      | -145.4    | 7.8       | -148.6    | -139.7     | -145.5    | -143.5    |

|              |          |          |          |          |          |          |          |          |        |         |           |          |           |           |           |           |
|--------------|----------|----------|----------|----------|----------|----------|----------|----------|--------|---------|-----------|----------|-----------|-----------|-----------|-----------|
| miR-182-3p   | 0.0      | 5.0      | 0.0      | 0.0      | 0.0      | 3.7      | 0.0      | 0.0      | -2.5   | 2.5     | -2.5      | -2.5     | -2.5      | 1.2       | -2.5      | -2.5      |
| miR-182-5p   | 3255.8   | 3262.8   | 4654.5   | 3072.9   | 4965.0   | 5300.6   | 5016.1   | 6489.7   | -3.5   | 3.5     | 1395.2    | -186.4   | 1705.7    | 2041.3    | 1756.8    | 3230.4    |
| miR-183-3p   | 6.9      | 8.0      | 0.0      | 0.0      | 4.3      | 0.0      | 0.0      | 0.0      | -0.6   | 0.6     | -7.4      | -7.4     | -3.2      | -7.4      | -7.4      | -7.4      |
| miR-183-5p   | 1559.1   | 1899.9   | 2245.9   | 1380.6   | 2196.3   | 2240.8   | 2131.1   | 2402.2   | -170.4 | 170.4   | 516.4     | -349.0   | 466.8     | 511.2     | 401.6     | 672.7     |
| miR-184      | 93.5     | 54.0     | 172.6    | 328.8    | 1913.5   | 166.2    | 367.0    | 136.8    | 19.7   | -19.7   | 98.9      | 255.0    | 1839.8    | 92.4      | 293.2     | 63.1      |
| miR-185-3p   | 0.0      | 8.0      | 15.0     | 0.0      | 8.6      | 19.9     | 17.9     | 0.0      | -4.0   | 4.0     | 11.0      | -4.0     | 4.6       | 15.9      | 13.9      | -4.0      |
| miR-185-5p   | 5007.4   | 4272.8   | 7488.1   | 4870.4   | 7816.0   | 7293.2   | 7702.1   | 9219.8   | 367.3  | -367.3  | 2848.0    | 230.3    | 3175.9    | 2653.1    | 3062.0    | 4579.7    |
| miR-186-5p   | 4893.3   | 4605.7   | 3933.1   | 4523.5   | 3591.4   | 4065.7   | 3296.6   | 4195.1   | 143.8  | -143.8  | -816.4    | -226.0   | -1158.1   | -683.8    | -1452.9   | -554.4    |
| miR-187-3p   | 110.0    | 99.0     | 55.9     | 135.6    | 66.8     | 93.1     | 59.7     | 71.8     | 5.5    | -5.5    | -48.6     | 31.1     | -37.7     | -11.4     | -44.8     | -32.7     |
| miR-188-5p   | 0.0      | 0.0      | 14.0     | 5.6      | 12.9     | 17.7     | 14.9     | 12.6     | 0.0    | 0.0     | 14.0      | 5.6      | 12.9      | 17.7      | 14.9      | 12.6      |
| miR-18a-3p   | 0.0      | 0.0      | 0.0      | 0.0      | 0.0      | 3.7      | 0.0      | 0.0      | 0.0    | 0.0     | 0.0       | 0.0      | 0.0       | 0.0       | 3.7       | 0.0       |
| miR-18a-5p   | 225.5    | 276.0    | 375.2    | 346.8    | 353.1    | 394.0    | 393.3    | 418.2    | -25.3  | 25.3    | 124.4     | 96.1     | 102.3     | 143.3     | 142.6     | 167.4     |
| miR-18b-5p   | 0.0      | 0.0      | 11.0     | 0.0      | 0.0      | 3.3      | 7.5      | 0.0      | 0.0    | 0.0     | 11.0      | 0.0      | 0.0       | 3.3       | 7.5       | 0.0       |
| miR-190a-3p  | 0.0      | 0.0      | 12.0     | 5.6      | 31.7     | 17.7     | 22.9     | 17.5     | 0.0    | 0.0     | 12.0      | 5.6      | 31.7      | 17.7      | 22.9      | 17.5      |
| miR-190a-5p  | 122.4    | 138.0    | 259.4    | 179.6    | 367.6    | 274.0    | 354.0    | 458.9    | -7.8   | 7.8     | 129.2     | 49.5     | 237.4     | 143.8     | 223.8     | 328.7     |
| miR-190b-5p  | 0.0      | 0.0      | 0.0      | 0.0      | 10.3     | 0.0      | 6.0      | 6.8      | 0.0    | 0.0     | 0.0       | 0.0      | 10.3      | 0.0       | 6.0       | 6.8       |
| miR-191-3p   | 8.2      | 14.0     | 11.0     | 5.6      | 0.0      | 3.7      | 0.0      | 5.8      | -2.9   | 2.9     | -0.1      | -5.5     | -11.1     | -7.4      | -11.1     | -5.3      |
| miR-191-5p   | 22202.0  | 19767.9  | 7732.5   | 21021.3  | 8133.1   | 7532.5   | 7341.1   | 9133.5   | 1217.0 | -1217.0 | -13252.4  | 36.4     | -12851.9  | -13452.5  | -13643.8  | -11851.5  |
| miR-192-3p   | 185.6    | 201.0    | 775.2    | 192.1    | 1003.5   | 1006.6   | 996.5    | 1045.9   | -7.7   | 7.7     | 581.9     | -1.2     | 810.2     | 813.3     | 803.1     | 852.6     |
| miR-192-5p   | 428947.4 | 420605.4 | 292064.3 | 339612.7 | 301890.2 | 296566.7 | 285734.2 | 316862.1 | 4171.0 | -4171.0 | -132712.1 | -85163.7 | -122886.2 | -128209.7 | -139042.2 | -107914.2 |
| miR-193a-3p  | 70.1     | 91.0     | 525.8    | 92.6     | 640.1    | 645.5    | 675.2    | 544.3    | -10.4  | 10.4    | 445.3     | 12.1     | 559.6     | 564.9     | 594.7     | 463.7     |
| miR-193a-5p  | 8.2      | 12.0     | 0.0      | 12.4     | 0.0      | 0.0      | 0.0      | 0.0      | -1.9   | 1.9     | -10.1     | 2.3      | -10.1     | -10.1     | -10.1     | -10.1     |
| miR-193b-3p  | 88.0     | 113.0    | 114.7    | 80.2     | 75.4     | 187.6    | 114.4    | 145.5    | -12.5  | 12.5    | 14.2      | -20.3    | -25.1     | 87.1      | 13.9      | 45.0      |
| miR-194-3p   | 180.1    | 186.0    | 302.3    | 180.8    | 438.7    | 404.7    | 445.5    | 461.8    | -2.9   | 2.9     | 119.3     | -2.3     | 255.7     | 221.7     | 262.5     | 278.8     |
| miR-194-5p   | 104325.1 | 84406.4  | 85083.2  | 89888.2  | 100659.3 | 80404.7  | 101777.2 | 92654.6  | 9959.4 | -9959.4 | -9282.6   | -4477.5  | 6293.6    | -13961.1  | 7411.4    | -1711.1   |
| miR-195-3p   | 33.0     | 33.0     | 29.9     | 30.5     | 37.7     | 17.0     | 26.9     | 25.2     | 0.0    | 0.0     | -3.1      | -2.5     | 4.7       | -16.0     | -6.1      | -7.8      |
| miR-195-5p   | 3352.0   | 3147.8   | 3202.8   | 3324.9   | 3276.0   | 3127.8   | 3459.7   | 3721.7   | 102.1  | -102.1  | -47.2     | 74.9     | 26.1      | -122.2    | 209.8     | 471.8     |
| miR-196a-5p  | 138.9    | 168.0    | 163.1    | 170.0    | 103.7    | 77.2     | 104.9    | 135.3    | -14.6  | 14.6    | 9.7       | 16.6     | -49.7     | -76.2     | -48.5     | -18.1     |
| miR-196b-3p  | 0.0      | 0.0      | 0.0      | 5.6      | 0.0      | 4.4      | 0.0      | 4.9      | 0.0    | 0.0     | 0.0       | 5.6      | 0.0       | 4.4       | 0.0       | 4.9       |
| miR-196b-5p  | 499.1    | 495.0    | 513.8    | 537.8    | 371.0    | 326.4    | 348.1    | 503.5    | 2.1    | -2.1    | 16.8      | 40.7     | -126.0    | -170.6    | -149.0    | 6.5       |
| miR-197-3p   | 97.6     | 109.0    | 41.9     | 114.1    | 0.0      | 107.8    | 86.5     | 81.5     | -5.7   | 5.7     | -61.4     | 10.8     | -103.3    | 4.5       | -16.8     | -21.8     |
| miR-199a-3p  | 9216.9   | 9228.5   | 10276.8  | 8804.5   | 10932.7  | 10559.3  | 10702.7  | 10110.5  | -5.8   | 5.8     | 1054.1    | -418.2   | 1710.0    | 1336.6    | 1480.0    | 887.8     |
| miR-199a-5p  | 9051.0   | 8022.1   | 1875.9   | 6840.8   | 1708.4   | 2202.0   | 1783.2   | 1798.9   | 514.5  | -514.5  | -6660.6   | -1695.7  | -6828.1   | -6334.5   | -6753.3   | -6737.6   |
| miR-199b-5p  | 3295.7   | 3127.8   | 4713.0   | 3254.4   | 5164.4   | 5871.5   | 5488.1   | 5569.6   | 83.9   | -83.9   | 1501.3    | 42.7     | 1952.7    | 2659.7    | 2276.4    | 2357.9    |
| miR-19a-3p   | 508.7    | 525.0    | 541.8    | 797.6    | 609.3    | 840.1    | 668.3    | 1068.2   | -8.1   | 8.1     | 24.9      | 280.8    | 92.4      | 323.3     | 151.4     | 551.3     |
| miR-19b-1-5p | 0.0      | 0.0      | 0.0      | 0.0      | 4.3      | 8.9      | 7.0      | 4.9      | 0.0    | 0.0     | 0.0       | 0.0      | 4.3       | 8.9       | 7.0       | 4.9       |
| miR-19b-3p   | 1643.0   | 1425.9   | 1678.7   | 2171.4   | 1800.0   | 1793.2   | 1951.6   | 2395.9   | 108.5  | -108.5  | 144.2     | 636.9    | 265.5     | 258.7     | 417.2     | 861.4     |
| miR-200a-3p  | 60367.3  | 54661.0  | 109701.5 | 60205.1  | 120697.7 | 128308.3 | 125533.4 | 131401.5 | 2853.2 | -2853.2 | 52187.4   | 2690.9   | 63183.6   | 70794.1   | 68019.2   | 73887.4   |
| miR-200a-5p  | 536.2    | 554.0    | 549.8    | 468.8    | 641.8    | 653.6    | 571.8    | 487.0    | -8.9   | 8.9     | 4.7       | -76.2    | 96.7      | 108.5     | 26.7      | -58.1     |
| miR-200b-3p  | 47878.4  | 40785.8  | 78815.3  | 43879.0  | 84183.2  | 82217.5  | 80705.0  | 91740.7  | 3546.3 | -3546.3 | 34483.3   | -453.0   | 39851.2   | 37885.4   | 36373.0   | 47408.6   |
| miR-200b-5p  | 515.6    | 409.0    | 388.1    | 396.5    | 457.6    | 381.8    | 436.6    | 386.1    | 53.3   | -53.3   | -74.2     | -65.7    | -4.7      | -80.5     | -25.7     | -76.1     |
| miR-200c-3p  | 10766.9  | 8961.5   | 11656.7  | 10481.3  | 11344.4  | 11693.9  | 11060.9  | 12840.1  | 902.7  | -902.7  | 1792.5    | 617.1    | 1480.2    | 1829.7    | 1196.7    | 2975.9    |
| miR-200c-5p  | 0.0      | 0.0      | 11.0     | 10.2     | 6.0      | 5.2      | 7.0      | 6.8      | 0.0    | 0.0     | 11.0      | 10.2     | 6.0       | 5.2       | 7.0       | 6.8       |
| miR-203a-3p  | 26928.9  | 24477.7  | 11887.1  | 26389.9  | 7838.3   | 6838.3   | 8050.2   | 7909.1   | 1225.6 | -1225.6 | -13816.2  | 686.6    | -17865.0  | -18865.0  | -17653.1  | -17794.2  |
| miR-203a-5p  | 0.0      | 15.0     | 13.0     | 7.9      | 17.1     | 5.2      | 0.0      | 13.6     | -7.5   | 7.5     | 5.5       | 0.4      | 9.6       | -2.3      | -7.5      | 6.1       |

|             |          |          |          |          |          |          |          |          |         |          |          |          |          |          |          |          |
|-------------|----------|----------|----------|----------|----------|----------|----------|----------|---------|----------|----------|----------|----------|----------|----------|----------|
| miR-203b-3p | 143.0    | 144.0    | 208.5    | 151.4    | 207.4    | 185.4    | 198.9    | 232.8    | -0.5    | 0.5      | 65.0     | 7.9      | 63.9     | 41.9     | 55.4     | 89.4     |
| miR-204-5p  | 118.2    | 138.0    | 48.9     | 105.1    | 54.8     | 56.1     | 47.7     | 53.4     | -9.9    | 9.9      | -79.2    | -23.1    | -73.3    | -72.0    | -80.4    | -74.8    |
| miR-205-3p  | 52.2     | 37.0     | 32.9     | 47.4     | 24.9     | 25.8     | 27.8     | 29.1     | 7.6     | -7.6     | -11.7    | 2.8      | -19.8    | -18.8    | -16.8    | -15.5    |
| miR-205-5p  | 1849.2   | 2023.9   | 272.4    | 1959.0   | 191.1    | 237.1    | 209.8    | 186.3    | -87.3   | 87.3     | -1664.2  | 22.4     | -1745.5  | -1699.5  | -1726.7  | -1750.3  |
| miR-206     | 13.7     | 3.3      | 196.2    | 13.2     | 239.7    | 184.6    | 236.7    | 316.3    | 5.2     | -5.2     | 187.7    | 4.6      | 231.1    | 176.1    | 228.1    | 307.7    |
| miR-208a-3p | 796.1    | 675.0    | 728.4    | 669.9    | 530.4    | 479.3    | 565.8    | 584.1    | 60.6    | -60.6    | -7.2     | -65.6    | -205.1   | -256.2   | -169.7   | -151.5   |
| miR-208a-5p | 24.7     | 33.0     | 44.9     | 49.7     | 26.6     | 11.1     | 24.9     | 35.9     | -4.1    | 4.1      | 16.0     | 20.8     | -2.3     | -17.8    | -4.0     | 7.0      |
| miR-208b-3p | 17.9     | 14.0     | 19.0     | 15.8     | 13.7     | 6.6      | 22.9     | 19.4     | 1.9     | -1.9     | 3.0      | -0.1     | -2.2     | -9.3     | 6.9      | 3.5      |
| miR-20a-3p  | 15.1     | 42.0     | 39.9     | 30.5     | 39.4     | 36.2     | 33.8     | 51.4     | -13.4   | 13.4     | 11.3     | 1.9      | 10.9     | 7.6      | 5.3      | 22.9     |
| miR-20a-5p  | 15283.0  | 12190.3  | 12110.8  | 15832.7  | 11756.6  | 13898.8  | 12135.4  | 15012.2  | 1546.3  | -1546.3  | -1625.9  | 2096.1   | -1980.1  | 162.1    | -1601.3  | 1275.6   |
| miR-20b-5p  | 46.7     | 33.0     | 109.3    | 56.1     | 161.5    | 181.7    | 114.4    | 148.8    | 6.9     | -6.9     | 69.4     | 16.2     | 121.7    | 141.8    | 74.5     | 108.9    |
| miR-21-3p   | 110.0    | 144.0    | 492.9    | 108.5    | 608.4    | 577.5    | 723.0    | 592.8    | -17.0   | 17.0     | 365.9    | -18.5    | 481.4    | 450.6    | 596.0    | 465.8    |
| miR-21-5p   | 565817.9 | 475902.8 | 730471.8 | 500235.3 | 826813.7 | 821694.6 | 880560.9 | 906753.3 | 44957.5 | -44957.5 | 209611.4 | -20625.1 | 305953.3 | 300834.2 | 359700.5 | 385892.9 |
| miR-210-3p  | 1253.9   | 1031.9   | 1218.2   | 1423.5   | 1335.1   | 1435.0   | 1604.1   | 1302.0   | 111.0   | -111.0   | 75.3     | 280.6    | 192.2    | 292.1    | 461.1    | 159.1    |
| miR-210-5p  | 13.7     | 30.0     | 0.0      | 9.0      | 0.0      | 3.7      | 0.0      | 0.0      | -8.1    | 8.1      | -21.9    | -12.8    | -21.9    | -18.2    | -21.9    | -21.9    |
| miR-2110    | 0.0      | 0.0      | 0.0      | 0.0      | 0.0      | 3.7      | 0.0      | 0.0      | 0.0     | 0.0      | 0.0      | 0.0      | 0.0      | 3.7      | 0.0      | 0.0      |
| miR-212-3p  | 24.7     | 42.0     | 23.9     | 26.0     | 42.8     | 48.7     | 31.8     | 38.8     | -8.6    | 8.6      | -9.4     | -7.4     | 9.5      | 15.4     | -1.6     | 5.4      |
| miR-212-5p  | 30.2     | 27.0     | 14.0     | 31.6     | 22.3     | 22.9     | 10.9     | 21.3     | 1.6     | -1.6     | -14.7    | 3.0      | -6.3     | -5.7     | -17.7    | -7.3     |
| miR-214-3p  | 353.4    | 380.0    | 141.7    | 357.0    | 164.5    | 212.0    | 198.9    | 183.4    | -13.3   | 13.3     | -225.0   | -9.7     | -202.1   | -154.7   | -167.8   | -183.3   |
| miR-214-5p  | 30.2     | 48.0     | 60.9     | 44.1     | 74.6     | 40.6     | 82.5     | 43.7     | -8.9    | 8.9      | 21.7     | 4.9      | 35.4     | 1.5      | 43.4     | 4.5      |
| miR-215-5p  | 1605.9   | 1525.4   | 1471.2   | 1423.5   | 1551.9   | 1538.0   | 1776.6   | 1397.6   | 40.2    | -40.2    | -94.5    | -142.2   | -13.8    | -27.6    | 211.0    | -168.1   |
| miR-216a-3p | 0.0      | 0.0      | 5.0      | 0.0      | 12.0     | 14.8     | 20.9     | 20.4     | 0.0     | 0.0      | 5.0      | 0.0      | 12.0     | 14.8     | 20.9     | 20.4     |
| miR-216a-5p | 0.0      | 0.0      | 607.6    | 0.0      | 916.9    | 955.7    | 964.6    | 920.7    | 0.0     | 0.0      | 607.6    | 0.0      | 916.9    | 955.7    | 964.6    | 920.7    |
| miR-216b-3p | 0.0      | 0.0      | 179.6    | 0.0      | 438.7    | 433.5    | 474.4    | 433.7    | 0.0     | 0.0      | 179.6    | 0.0      | 438.7    | 433.5    | 474.4    | 433.7    |
| miR-216b-5p | 0.0      | 0.0      | 280.4    | 0.0      | 422.5    | 562.8    | 445.5    | 339.6    | 0.0     | 0.0      | 280.4    | 0.0      | 422.5    | 562.8    | 445.5    | 339.6    |
| miR-217-3p  | 0.0      | 0.0      | 35.9     | 0.0      | 51.4     | 55.4     | 39.8     | 44.6     | 0.0     | 0.0      | 35.9     | 0.0      | 51.4     | 55.4     | 39.8     | 44.6     |
| miR-217-5p  | 0.0      | 0.0      | 2435.5   | 0.0      | 3846.7   | 3923.2   | 3587.0   | 3612.1   | 0.0     | 0.0      | 2435.5   | 0.0      | 3846.7   | 3923.2   | 3587.0   | 3612.1   |
| miR-218-5p  | 209.0    | 223.5    | 219.0    | 220.3    | 239.9    | 196.5    | 263.0    | 223.6    | -7.3    | 7.3      | 2.8      | 4.1      | 23.7     | -19.8    | 46.8     | 7.4      |
| miR-219a-5p | 30.2     | 29.0     | 182.6    | 32.8     | 251.1    | 231.2    | 275.5    | 275.5    | 0.6     | -0.6     | 153.0    | 3.1      | 221.5    | 201.5    | 245.8    | 245.9    |
| miR-22-3p   | 58374.4  | 52223.1  | 105777.9 | 51648.9  | 130161.2 | 115160.9 | 140412.0 | 133635.4 | 3075.6  | -3075.6  | 50479.1  | -3649.9  | 74862.4  | 59862.2  | 85113.2  | 78336.7  |
| miR-22-5p   | 1531.6   | 1564.9   | 400.1    | 1827.9   | 418.2    | 462.3    | 503.2    | 377.4    | -16.6   | 16.6     | -1148.2  | 279.7    | -1130.1  | -1085.9  | -1045.1  | -1170.9  |
| miR-221-3p  | 2349.7   | 2601.9   | 1754.0   | 2530.6   | 1849.2   | 2135.9   | 1926.3   | 2154.8   | -126.1  | 126.1    | -721.8   | 54.9     | -626.5   | -339.9   | -549.5   | -321.0   |
| miR-221-5p  | 156.7    | 172.0    | 59.9     | 177.4    | 60.0     | 62.8     | 46.7     | 62.1     | -7.6    | 7.6      | -104.5   | 13.0     | -104.4   | -101.6   | -117.6   | -102.3   |
| miR-222-3p  | 398.7    | 452.0    | 410.1    | 338.9    | 452.5    | 391.4    | 434.6    | 413.3    | -26.6   | 26.6     | -15.3    | -86.4    | 27.1     | -33.9    | 9.2      | -12.0    |
| miR-222-5p  | 0.0      | 7.0      | 9.0      | 7.9      | 15.4     | 24.4     | 18.9     | 28.1     | -3.5    | 3.5      | 5.5      | 4.4      | 11.9     | 20.9     | 15.4     | 24.6     |
| miR-223-3p  | 416.6    | 451.0    | 462.0    | 477.9    | 466.2    | 534.7    | 470.4    | 403.6    | -17.2   | 17.2     | 28.2     | 44.1     | 32.4     | 100.9    | 36.6     | -30.2    |
| miR-223-5p  | 49.5     | 47.0     | 5.0      | 49.7     | 15.4     | 8.1      | 0.0      | 9.7      | 1.2     | -1.2     | -43.3    | 1.5      | -32.8    | -40.1    | -48.2    | -38.5    |
| miR-23a-3p  | 12090.9  | 14091.7  | 7469.1   | 13130.6  | 7905.6   | 8104.9   | 7770.2   | 7626.7   | -1000.4 | 1000.4   | -5622.2  | 39.2     | -5185.7  | -4986.5  | -5321.1  | -5464.6  |
| miR-23a-5p  | 0.0      | 0.0      | 5.0      | 0.0      | 0.0      | 0.0      | 0.0      | 0.0      | 0.0     | 0.0      | 5.0      | 0.0      | 0.0      | 0.0      | 0.0      | 0.0      |
| miR-23b-3p  | 9646.3   | 11052.9  | 7964.0   | 10210.1  | 8199.5   | 8726.7   | 8048.7   | 8336.0   | -703.3  | 703.3    | -2385.6  | -139.5   | -2150.1  | -1622.9  | -2300.9  | -2013.7  |
| miR-23b-5p  | 0.0      | 12.0     | 5.0      | 0.0      | 9.4      | 3.7      | 7.0      | 5.8      | -6.0    | 6.0      | -1.0     | -6.0     | 3.4      | -2.3     | 1.0      | -0.2     |
| miR-23c     | 0.0      | 0.0      | 0.0      | 0.0      | 0.0      | 2.2      | 0.0      | 0.0      | 0.0     | 0.0      | 0.0      | 0.0      | 0.0      | 2.2      | 0.0      | 0.0      |
| miR-24-5p   | 1853.4   | 1825.9   | 1548.5   | 1687.9   | 1425.9   | 1501.5   | 1642.9   | 1392.2   | 13.7    | -13.7    | -291.1   | -151.8   | -413.7   | -338.2   | -196.8   | -447.4   |
| miR-24-3p   | 15399.6  | 14872.7  | 13178.2  | 13323.2  | 12262.2  | 11341.6  | 11971.3  | 11272.8  | 263.5   | -263.5   | -1957.9  | -1813.0  | -2874.0  | -3794.6  | -3164.8  | -3863.4  |
| miR-25-3p   | 5303.0   | 5267.7   | 4436.0   | 5318.9   | 4543.4   | 4703.8   | 4683.9   | 3765.3   | 17.7    | -17.7    | -849.4   | 33.5     | -741.9   | -581.5   | -601.4   | -1520.0  |

|             |          |          |          |          |          |          |          |          |         |          |          |          |          |          |          |          |
|-------------|----------|----------|----------|----------|----------|----------|----------|----------|---------|----------|----------|----------|----------|----------|----------|----------|
| miR-25-5p   | 39.9     | 48.0     | 40.9     | 50.8     | 25.7     | 23.6     | 14.9     | 23.3     | -4.1    | 4.1      | -3.0     | 6.9      | -18.2    | -20.3    | -29.0    | -20.7    |
| miR-26a-3p  | 96.2     | 123.0    | 187.6    | 102.8    | 161.1    | 143.3    | 189.9    | 191.1    | -13.4   | 13.4     | 78.0     | -6.8     | 51.5     | 33.7     | 80.3     | 81.5     |
| miR-26a-5p  | 106321.5 | 99394.0  | 49977.9  | 99383.2  | 49858.3  | 44822.8  | 48082.4  | 51603.5  | 3463.7  | -3463.7  | -52879.9 | -3474.6  | -52999.5 | -58034.9 | -54775.4 | -51254.3 |
| miR-26b-3p  | 92.1     | 128.0    | 38.9     | 84.7     | 42.0     | 72.4     | 55.7     | 33.0     | -17.9   | 17.9     | -71.1    | -25.3    | -68.1    | -37.7    | -54.4    | -77.1    |
| miR-26b-5p  | 37705.4  | 36126.0  | 25369.0  | 40063.3  | 26275.7  | 25029.3  | 28248.3  | 25950.0  | 789.7   | -789.7   | -11546.7 | 3147.6   | -10640.1 | -11886.4 | -8667.4  | -10965.8 |
| miR-27a-3p  | 40904.8  | 44159.4  | 33794.8  | 35728.8  | 33685.9  | 32953.2  | 35655.6  | 29192.4  | -1627.3 | 1627.3   | -8737.3  | -6803.3  | -8846.2  | -9578.9  | -6876.5  | -13339.8 |
| miR-27a-5p  | 232.4    | 230.0    | 237.5    | 224.8    | 212.5    | 192.8    | 223.8    | 225.1    | 1.2     | -1.2     | 6.3      | -6.4     | -18.7    | -38.4    | -7.4     | -6.1     |
| miR-27b-3p  | 182460.4 | 180403.9 | 109309.6 | 152784.7 | 109662.8 | 105632.3 | 106898.8 | 99518.8  | 1028.2  | -1028.2  | -72122.6 | -28647.4 | -71769.3 | -75799.9 | -74533.3 | -81913.3 |
| miR-27b-5p  | 82.5     | 111.0    | 231.5    | 93.8     | 207.4    | 144.0    | 193.9    | 199.9    | -14.2   | 14.2     | 134.7    | -3.0     | 110.6    | 47.3     | 97.2     | 103.1    |
| miR-28-3p   | 338.2    | 307.0    | 428.0    | 378.5    | 453.3    | 506.6    | 516.1    | 537.5    | 15.6    | -15.6    | 105.4    | 55.9     | 130.7    | 184.0    | 193.5    | 214.9    |
| miR-28-5p   | 1574.3   | 1312.6   | 1444.7   | 1332.4   | 1480.8   | 1531.0   | 1489.7   | 1523.2   | 130.8   | -130.8   | 1.3      | -111.1   | 37.3     | 87.6     | 46.3     | 79.8     |
| miR-296-5p  | 13.7     | 21.0     | 5.0      | 12.4     | 6.0      | 12.6     | 9.9      | 7.8      | -3.6    | 3.6      | -12.4    | -4.9     | -11.4    | -4.8     | -7.4     | -9.6     |
| miR-299-3p  | 48.1     | 75.0     | 104.8    | 53.1     | 137.1    | 141.8    | 177.0    | 182.4    | -13.4   | 13.4     | 43.2     | -8.5     | 75.5     | 80.2     | 115.5    | 120.8    |
| miR-299-5p  | 9.6      | 0.0      | 12.0     | 5.6      | 18.9     | 21.4     | 5.0      | 11.6     | 4.8     | -4.8     | 7.2      | 0.8      | 14.0     | 16.6     | 0.2      | 6.8      |
| miR-29a-3p  | 95034.9  | 91396.7  | 92324.3  | 93690.4  | 96056.8  | 86809.6  | 98647.6  | 84086.8  | 1819.1  | -1819.1  | -891.5   | 474.6    | 2841.0   | -6406.2  | 5431.8   | -9129.0  |
| miR-29a-5p  | 37.1     | 59.0     | 123.7    | 79.1     | 132.8    | 152.1    | 158.1    | 118.4    | -10.9   | 10.9     | 75.7     | 31.0     | 84.8     | 104.1    | 110.1    | 70.3     |
| miR-29b-5p  | 88.0     | 74.0     | 75.8     | 90.4     | 50.6     | 82.7     | 53.7     | 107.7    | 7.0     | -7.0     | -5.2     | 9.4      | -30.4    | 1.7      | -27.3    | 26.7     |
| miR-29b-3p  | 1260.8   | 1467.7   | 1657.3   | 1281.7   | 2423.0   | 2371.3   | 2706.4   | 2267.4   | -103.4  | 103.4    | 293.0    | -82.5    | 1058.7   | 1007.1   | 1342.2   | 903.1    |
| miR-29c-3p  | 1522.0   | 1721.7   | 4973.8   | 1682.2   | 6459.1   | 6045.2   | 7290.4   | 5886.7   | -99.8   | 99.8     | 3351.9   | 60.4     | 4837.2   | 4423.4   | 5668.6   | 4264.9   |
| miR-29c-5p  | 122.4    | 135.0    | 187.6    | 127.7    | 236.5    | 262.2    | 256.6    | 259.0    | -6.3    | 6.3      | 58.9     | -1.0     | 107.8    | 133.5    | 127.9    | 130.4    |
| miR-301a-3p | 46.7     | 64.0     | 87.8     | 64.4     | 112.3    | 121.1    | 159.1    | 142.6    | -8.6    | 8.6      | 32.4     | 9.0      | 56.9     | 65.8     | 103.7    | 87.2     |
| miR-301a-5p | 33.0     | 35.0     | 16.0     | 32.8     | 11.1     | 9.6      | 9.0      | 0.0      | -1.0    | 1.0      | -18.0    | -1.2     | -22.9    | -24.4    | -25.0    | -34.0    |
| miR-302a-3p | 0.0      | 0.0      | 0.0      | 0.0      | 0.0      | 69.9     | 0.0      | 0.0      | 0.0     | 0.0      | 0.0      | 0.0      | 0.0      | 69.9     | 0.0      | 0.0      |
| miR-302a-5p | 0.0      | 0.0      | 0.0      | 0.0      | 0.0      | 711.2    | 0.0      | 0.0      | 0.0     | 0.0      | 0.0      | 0.0      | 0.0      | 711.2    | 0.0      | 0.0      |
| miR-302b-3p | 0.0      | 0.0      | 0.0      | 0.0      | 0.0      | 860.9    | 0.0      | 0.0      | 0.0     | 0.0      | 0.0      | 0.0      | 0.0      | 860.9    | 0.0      | 0.0      |
| miR-302c-3p | 0.0      | 0.0      | 0.0      | 0.0      | 0.0      | 29.5     | 0.0      | 0.0      | 0.0     | 0.0      | 0.0      | 0.0      | 0.0      | 29.5     | 0.0      | 0.0      |
| miR-302c-5p | 0.0      | 0.0      | 0.0      | 0.0      | 0.0      | 19.2     | 0.0      | 0.0      | 0.0     | 0.0      | 0.0      | 0.0      | 0.0      | 19.2     | 0.0      | 0.0      |
| miR-302d-3p | 0.0      | 0.0      | 0.0      | 0.0      | 0.0      | 86.9     | 0.0      | 0.0      | 0.0     | 0.0      | 0.0      | 0.0      | 0.0      | 86.9     | 0.0      | 0.0      |
| miR-3065-5p | 0.0      | 0.0      | 0.0      | 0.0      | 0.0      | 3.7      | 0.0      | 0.0      | 0.0     | 0.0      | 0.0      | 0.0      | 0.0      | 3.7      | 0.0      | 0.0      |
| miR-3074-3p | 0.0      | 7.0      | 0.0      | 0.0      | 0.0      | 0.0      | 0.0      | 0.0      | -3.5    | 3.5      | -3.5     | -3.5     | -3.5     | -3.5     | -3.5     | -3.5     |
| miR-3074-5p | 0.0      | 0.0      | 0.0      | 0.0      | 4.3      | 5.2      | 0.0      | 0.0      | 0.0     | 0.0      | 0.0      | 0.0      | 4.3      | 5.2      | 0.0      | 0.0      |
| miR-30a-3p  | 1735.8   | 1758.9   | 1933.6   | 1694.6   | 2204.4   | 2010.7   | 2010.8   | 2165.0   | -11.5   | 11.5     | 186.3    | -52.7    | 457.1    | 263.3    | 263.4    | 417.6    |
| miR-30a-5p  | 124659.3 | 101447.4 | 122295.1 | 108844.3 | 121838.7 | 106026.2 | 124617.0 | 132619.1 | 11605.9 | -11605.9 | 9241.7   | -4209.0  | 8785.4   | -7027.2  | 11563.6  | 19565.8  |
| miR-30b-3p  | 360.2    | 344.0    | 441.0    | 275.7    | 403.6    | 375.9    | 382.9    | 516.1    | 8.1     | -8.1     | 88.9     | -76.4    | 51.5     | 23.8     | 30.8     | 164.0    |
| miR-30b-5p  | 32267.7  | 32166.6  | 43627.4  | 35687.8  | 41513.8  | 35348.6  | 40677.8  | 40560.5  | 50.6    | -50.6    | 11410.3  | 3470.6   | 9296.7   | 3131.5   | 8460.7   | 8343.4   |
| miR-30c-3p  | 749.3    | 782.0    | 1102.5   | 716.3    | 1234.8   | 1305.0   | 1234.1   | 1435.9   | -16.3   | 16.3     | 336.9    | -49.4    | 469.2    | 539.4    | 468.5    | 670.3    |
| miR-30c-5p  | 51794.8  | 49390.1  | 25502.4  | 50080.2  | 24463.1  | 25152.5  | 24268.2  | 27682.1  | 1202.3  | -1202.3  | -25090.1 | -512.2   | -26129.3 | -25440.0 | -26324.3 | -22910.4 |
| miR-30d-3p  | 305.2    | 356.0    | 219.5    | 333.3    | 247.7    | 215.7    | 206.8    | 232.8    | -25.4   | 25.4     | -111.1   | 2.7      | -83.0    | -114.9   | -123.8   | -97.8    |
| miR-30d-5p  | 64590.3  | 55335.5  | 27174.1  | 55016.7  | 24620.8  | 21624.1  | 24481.2  | 23750.5  | 4627.4  | -4627.4  | -32788.8 | -4946.2  | -35342.1 | -38338.8 | -35481.7 | -36212.4 |
| miR-30e-3p  | 1590.1   | 1578.9   | 1701.2   | 1533.1   | 1422.1   | 1408.0   | 1359.4   | 1541.2   | 5.6     | -5.6     | 116.7    | -51.4    | -162.4   | -176.4   | -225.1   | -43.3    |
| miR-30e-5p  | 200677.9 | 156494.9 | 183565.1 | 185730.8 | 155022.8 | 142837.1 | 154073.4 | 191750.9 | 22091.5 | -22091.5 | 4978.7   | 7144.4   | -23563.6 | -35749.3 | -24513.0 | 13164.5  |
| miR-31-3p   | 16.5     | 36.0     | 273.4    | 37.3     | 347.1    | 349.3    | 309.3    | 321.1    | -9.7    | 9.7      | 247.1    | 11.0     | 320.8    | 323.1    | 283.0    | 294.9    |
| miR-31-5p   | 966.6    | 817.0    | 2024.4   | 973.8    | 2837.3   | 2566.5   | 2817.3   | 2420.7   | 74.8    | -74.8    | 1132.7   | 82.1     | 1945.5   | 1674.7   | 1925.6   | 1528.9   |
| miR-32-3p   | 15.1     | 18.0     | 20.0     | 9.0      | 24.9     | 29.5     | 31.8     | 28.1     | -1.4    | 1.4      | 3.4      | -7.5     | 8.3      | 13.0     | 15.3     | 11.6     |
| miR-32-5p   | 250.2    | 261.0    | 785.2    | 291.5    | 862.9    | 927.6    | 1074.0   | 945.9    | -5.4    | 5.4      | 529.6    | 35.9     | 607.3    | 672.0    | 818.4    | 690.3    |



|             |        |        |        |        |        |        |        |        |        |       |         |        |         |        |         |         |
|-------------|--------|--------|--------|--------|--------|--------|--------|--------|--------|-------|---------|--------|---------|--------|---------|---------|
| miR-320a-3p | 1174.2 | 1163.9 | 755.3  | 1082.4 | 759.0  | 821.5  | 900.3  | 981.2  | 5.1    | -5.1  | -413.8  | -86.7  | -410.1  | -347.5 | -268.7  | -187.9  |
| miR-320b    | 8.2    | 9.5    | 5.0    | 7.4    | 11.3   | 4.7    | 4.3    | 6.1    | -0.6   | 0.6   | -3.9    | -1.5   | 2.4     | -4.2   | -4.6    | -2.7    |
| miR-320c    | 0.0    | 0.0    | 0.0    | 0.8    | 0.9    | 0.0    | 0.0    | 0.0    | 0.0    | 0.0   | 0.0     | 0.8    | 0.9     | 0.0    | 0.0     | 0.0     |
| miR-320d    | 0.0    | 0.0    | 0.0    | 0.8    | 0.0    | 0.0    | 0.0    | 0.0    | 0.0    | 0.0   | 0.0     | 0.8    | 0.0     | 0.0    | 0.0     | 0.0     |
| miR-323a-3p | 13.7   | 12.0   | 5.0    | 19.2   | 6.9    | 5.9    | 6.0    | 0.0    | 0.9    | -0.9  | -7.9    | 6.3    | -6.0    | -7.0   | -6.9    | -12.9   |
| miR-324-3p  | 24.7   | 25.0   | 42.9   | 30.5   | 78.8   | 67.2   | 66.6   | 42.7   | -0.1   | 0.1   | 18.0    | 5.6    | 54.0    | 42.3   | 41.8    | 17.8    |
| miR-324-5p  | 118.2  | 141.0  | 118.7  | 111.8  | 136.3  | 157.3  | 127.3  | 124.2  | -11.4  | 11.4  | -10.9   | -17.8  | 6.6     | 27.7   | -2.3    | -5.4    |
| miR-326     | 123.7  | 111.0  | 127.7  | 110.7  | 172.2  | 174.3  | 184.0  | 137.8  | 6.4    | -6.4  | 10.3    | -6.7   | 54.9    | 56.9   | 66.6    | 20.4    |
| miR-328-3p  | 736.9  | 771.0  | 415.1  | 578.4  | 546.7  | 671.3  | 555.9  | 456.0  | -17.0  | 17.0  | -338.9  | -175.5 | -207.2  | -82.6  | -198.0  | -298.0  |
| miR-330-3p  | 28.9   | 15.0   | 13.0   | 13.6   | 16.3   | 13.3   | 5.0    | 16.5   | 6.9    | -6.9  | -9.0    | -8.4   | -5.7    | -8.6   | -17.0   | -5.4    |
| miR-330-5p  | 83.9   | 62.0   | 112.7  | 63.3   | 92.5   | 116.0  | 88.5   | 93.1   | 10.9   | -10.9 | 39.8    | -9.7   | 19.6    | 43.0   | 15.6    | 20.2    |
| miR-331-3p  | 181.5  | 190.0  | 76.8   | 146.9  | 77.1   | 75.3   | 87.5   | 74.7   | -4.3   | 4.3   | -108.9  | -38.9  | -108.6  | -110.4 | -98.2   | -111.0  |
| miR-331-5p  | 16.5   | 8.0    | 10.0   | 0.0    | 19.7   | 13.3   | 10.9   | 10.7   | 4.2    | -4.2  | -2.3    | -12.2  | 7.5     | 1.0    | -1.3    | -1.6    |
| miR-335-3p  | 290.1  | 333.0  | 116.7  | 238.4  | 156.0  | 123.3  | 104.4  | 156.2  | -21.4  | 21.4  | -194.8  | -73.2  | -155.6  | -188.2 | -207.1  | -155.3  |
| miR-335-5p  | 1755.8 | 1605.9 | 1105.5 | 1774.8 | 1144.9 | 1116.7 | 1099.9 | 1546.5 | 74.9   | -74.9 | -575.3  | 94.0   | -536.0  | -564.1 | -581.0  | -134.3  |
| miR-338-3p  | 68.7   | 95.0   | 103.8  | 101.7  | 114.8  | 74.6   | 126.3  | 111.6  | -13.1  | 13.1  | 21.9    | 19.8   | 33.0    | -7.3   | 44.4    | 29.7    |
| miR-338-5p  | 30.2   | 37.0   | 38.9   | 23.7   | 35.1   | 37.7   | 26.9   | 25.2   | -3.4   | 3.4   | 5.3     | -9.9   | 1.5     | 4.0    | -6.8    | -8.4    |
| miR-339-3p  | 0.0    | 11.0   | 0.0    | 0.0    | 0.0    | 0.0    | 0.0    | 0.0    | -5.5   | 5.5   | -5.5    | -5.5   | -5.5    | -5.5   | -5.5    | -5.5    |
| miR-339-5p  | 2400.6 | 2841.8 | 1495.6 | 2258.4 | 1549.3 | 1739.3 | 1581.2 | 1045.9 | -220.6 | 220.6 | -1125.6 | -362.8 | -1071.9 | -881.9 | -1040.0 | -1575.3 |
| miR-33a-3p  | 19.2   | 29.0   | 5.0    | 31.6   | 11.1   | 10.3   | 16.9   | 15.5   | -4.9   | 4.9   | -19.1   | 7.5    | -13.0   | -13.8  | -7.2    | -8.6    |
| miR-33a-5p  | 242.0  | 221.0  | 711.4  | 229.3  | 862.1  | 791.0  | 1013.4 | 762.6  | 10.5   | -10.5 | 479.9   | -2.1   | 630.6   | 559.5  | 781.9   | 531.1   |
| miR-340-3p  | 264.0  | 363.0  | 78.8   | 244.0  | 87.4   | 73.1   | 85.5   | 124.2  | -49.5  | 49.5  | -234.7  | -69.5  | -226.1  | -240.4 | -228.0  | -189.3  |
| miR-340-5p  | 5264.5 | 5569.7 | 8344.1 | 5182.2 | 7551.2 | 6709.0 | 7458.5 | 8144.8 | -152.6 | 152.6 | 2927.0  | -234.9 | 2134.1  | 1291.9 | 2041.4  | 2727.7  |
| miR-342-3p  | 1062.8 | 1169.9 | 1297.1 | 1046.2 | 1167.1 | 1410.6 | 979.5  | 1281.6 | -53.6  | 53.6  | 180.7   | -70.2  | 50.8    | 294.3  | -136.8  | 165.3   |
| miR-342-5p  | 0.0    | 0.0    | 0.0    | 0.0    | 0.0    | 3.7    | 0.0    | 11.6   | 0.0    | 0.0   | 0.0     | 0.0    | 0.0     | 3.7    | 0.0     | 11.6    |
| miR-345-3p  | 228.2  | 188.0  | 183.6  | 189.8  | 175.7  | 219.3  | 176.0  | 162.0  | 20.1   | -20.1 | -24.5   | -18.3  | -32.4   | 11.2   | -32.1   | -46.1   |
| miR-345-5p  | 0.0    | 0.0    | 0.0    | 0.0    | 0.0    | 3.7    | 0.0    | 0.0    | 0.0    | 0.0   | 0.0     | 0.0    | 0.0     | 3.7    | 0.0     | 0.0     |
| miR-34a-3p  | 0.0    | 6.0    | 0.0    | 0.0    | 12.9   | 0.0    | 0.0    | 7.8    | -3.0   | 3.0   | -3.0    | -3.0   | 9.9     | -3.0   | -3.0    | 4.8     |
| miR-34a-5p  | 284.6  | 253.0  | 721.4  | 340.1  | 960.6  | 922.5  | 1038.2 | 1154.5 | 15.8   | -15.8 | 452.6   | 71.3   | 691.8   | 653.7  | 769.4   | 885.7   |
| miR-34b-3p  | 12.4   | 16.0   | 0.0    | 11.3   | 8.6    | 9.6    | 0.0    | 9.7    | -1.8   | 1.8   | -14.2   | -2.9   | -5.6    | -4.6   | -14.2   | -4.5    |
| miR-34b-5p  | 0.0    | 0.0    | 0.0    | 0.0    | 0.0    | 4.4    | 5.0    | 6.8    | 0.0    | 0.0   | 0.0     | 0.0    | 0.0     | 4.4    | 5.0     | 6.8     |
| miR-34c-5p  | 522.5  | 499.0  | 919.9  | 593.1  | 790.1  | 760.7  | 764.7  | 1024.5 | 11.7   | -11.7 | 409.2   | 82.4   | 279.4   | 250.0  | 254.0   | 513.8   |
| miR-361-3p  | 247.5  | 228.0  | 67.8   | 265.5  | 74.6   | 109.3  | 82.5   | 97.0   | 9.7    | -9.7  | -169.9  | 27.8   | -163.2  | -128.4 | -155.2  | -140.7  |
| miR-361-5p  | 963.8  | 1104.9 | 914.9  | 872.2  | 904.9  | 1024.4 | 927.8  | 978.9  | -70.6  | 70.6  | -119.4  | -162.2 | -129.5  | -10.0  | -106.5  | -55.4   |
| miR-362-3p  | 1714.5 | 1739.9 | 2615.1 | 1771.5 | 2993.2 | 3321.3 | 3184.3 | 2737.9 | -12.7  | 12.7  | 887.9   | 44.2   | 1266.0  | 1594.1 | 1457.1  | 1010.7  |
| miR-362-5p  | 301.1  | 302.0  | 129.7  | 319.7  | 132.8  | 143.3  | 138.2  | 157.2  | -0.4   | 0.4   | -171.8  | 18.2   | -168.7  | -158.3 | -163.3  | -144.4  |
| miR-363-3p  | 92.1   | 45.0   | 61.9   | 30.5   | 94.3   | 186.1  | 84.5   | 103.8  | 23.6   | -23.6 | -6.7    | -38.1  | 25.7    | 117.6  | 16.0    | 35.3    |
| miR-365b-3p | 1103.4 | 1201.9 | 761.8  | 1131.4 | 949.5  | 1289.5 | 1112.8 | 1164.2 | -49.3  | 49.3  | -390.9  | -21.2  | -203.2  | 136.9  | -39.8   | 11.6    |
| miR-365b-5p | 15.1   | 20.0   | 20.0   | 22.6   | 18.0   | 22.2   | 17.9   | 19.4   | -2.4   | 2.4   | 2.4     | 5.0    | 0.4     | 4.6    | 0.3     | 1.8     |
| miR-367-3p  | 0.0    | 0.0    | 0.0    | 0.0    | 0.0    | 4.4    | 0.0    | 0.0    | 0.0    | 0.0   | 0.0     | 0.0    | 0.0     | 4.4    | 0.0     | 0.0     |
| miR-369-3p  | 94.9   | 78.0   | 162.6  | 68.9   | 200.5  | 160.3  | 200.9  | 141.6  | 8.4    | -8.4  | 76.2    | -17.5  | 114.1   | 73.8   | 114.4   | 55.2    |
| miR-369-5p  | 12.4   | 28.0   | 12.0   | 19.2   | 22.3   | 17.0   | 20.9   | 11.6   | -7.8   | 7.8   | -8.2    | -1.0   | 2.1     | -3.2   | 0.7     | -8.5    |
| miR-370-3p  | 9.6    | 8.0    | 5.0    | 11.3   | 9.4    | 5.9    | 9.0    | 18.4   | 0.8    | -0.8  | -3.8    | 2.5    | 0.6     | -2.9   | 0.1     | 9.6     |
| miR-371a-5p | 0.0    | 0.0    | 0.0    | 0.0    | 0.0    | 5.2    | 0.0    | 0.0    | 0.0    | 0.0   | 0.0     | 0.0    | 0.0     | 5.2    | 0.0     | 0.0     |
| miR-372-3p  | 0.0    | 0.0    | 0.0    | 0.0    | 0.0    | 21.4   | 0.0    | 0.0    | 0.0    | 0.0   | 0.0     | 0.0    | 0.0     | 21.4   | 0.0     | 0.0     |

|             |         |         |         |         |         |         |         |         |        |         |          |         |          |          |          |          |
|-------------|---------|---------|---------|---------|---------|---------|---------|---------|--------|---------|----------|---------|----------|----------|----------|----------|
| miR-374a-3p | 0.0     | 0.0     | 0.0     | 7.9     | 0.0     | 5.2     | 0.0     | 10.7    | 0.0    | 0.0     | 0.0      | 7.9     | 0.0      | 5.2      | 0.0      | 10.7     |
| miR-374a-5p | 11.0    | 8.0     | 0.0     | 0.0     | 0.0     | 11.8    | 5.0     | 16.5    | 1.5    | -1.5    | -9.5     | -9.5    | -9.5     | 2.3      | -4.5     | 7.0      |
| miR-374b-3p | 44.0    | 53.0    | 23.9    | 37.3    | 20.6    | 22.2    | 25.9    | 17.5    | -4.5   | 4.5     | -24.6    | -11.2   | -27.9    | -26.3    | -22.6    | -31.0    |
| miR-374b-5p | 1975.7  | 1892.9  | 2376.6  | 2169.1  | 2444.8  | 2697.9  | 2344.9  | 2602.1  | 41.4   | -41.4   | 442.3    | 234.8   | 510.5    | 763.6    | 410.6    | 667.8    |
| miR-375-3p  | 4084.8  | 4165.8  | 6776.7  | 3974.5  | 9679.8  | 9096.7  | 10570.1 | 8705.6  | -40.5  | 40.5    | 2651.4   | -150.8  | 5554.5   | 4971.4   | 6444.8   | 4580.3   |
| miR-376a-3p | 0.0     | 6.0     | 10.0    | 0.0     | 17.1    | 13.3    | 12.9    | 4.9     | -3.0   | 3.0     | 7.0      | -3.0    | 14.1     | 10.3     | 9.9      | 1.9      |
| miR-376a-5p | 6.9     | 0.0     | 8.0     | 6.8     | 12.0    | 15.5    | 15.9    | 5.8     | 3.4    | -3.4    | 4.5      | 3.3     | 8.6      | 12.1     | 12.5     | 2.4      |
| miR-377-3p  | 0.0     | 15.0    | 15.0    | 5.6     | 18.0    | 36.2    | 25.9    | 20.4    | -7.5   | 7.5     | 7.5      | -1.9    | 10.5     | 28.7     | 18.4     | 12.9     |
| miR-377-5p  | 0.0     | 0.0     | 0.0     | 5.6     | 0.0     | 0.0     | 0.0     | 0.0     | 0.0    | 0.0     | 0.0      | 5.6     | 0.0      | 0.0      | 0.0      | 0.0      |
| miR-378a-3p | 46798.6 | 39390.8 | 31634.7 | 40998.4 | 31611.6 | 31492.2 | 30241.1 | 30880.0 | 3703.9 | -3703.9 | -11460.0 | -2096.3 | -11483.1 | -11602.5 | -12853.6 | -12214.7 |
| miR-378a-5p | 1152.2  | 1145.9  | 689.4   | 1110.5  | 587.9   | 737.8   | 630.5   | 590.9   | 3.1    | -3.1    | -459.6   | -38.5   | -561.2   | -411.2   | -518.6   | -558.2   |
| miR-378b    | 0.0     | 3.5     | 0.0     | 0.0     | 0.0     | 0.0     | 0.0     | 1.2     | -1.7   | 1.7     | -1.7     | -1.7    | -1.7     | -1.7     | -1.7     | -0.5     |
| miR-378c    | 6641.5  | 5976.7  | 4220.7  | 5983.4  | 3743.5  | 3837.8  | 4057.4  | 3151.7  | 332.4  | -332.4  | -2088.4  | -325.6  | -2565.6  | -2471.2  | -2251.6  | -3157.4  |
| miR-378d    | 7919.5  | 7085.5  | 5086.8  | 7058.6  | 4527.2  | 4625.0  | 5085.9  | 3665.3  | 417.0  | -417.0  | -2415.7  | -443.9  | -2975.3  | -2877.5  | -2416.6  | -3837.2  |
| miR-378e    | 5.0     | 1.6     | 5.2     | 1.6     | 2.6     | 3.0     | 3.2     | 1.9     | 1.7    | -1.7    | 1.9      | -1.7    | -0.7     | -0.4     | -0.1     | -1.4     |
| miR-378f    | 0.0     | 0.0     | 2.5     | 3.4     | 0.0     | 1.3     | 0.0     | 0.0     | 0.0    | 0.0     | 2.5      | 3.4     | 0.0      | 1.3      | 0.0      | 0.0      |
| miR-378g    | 0.0     | 3.0     | 19.0    | 13.0    | 10.3    | 10.0    | 8.5     | 10.7    | -1.5   | 1.5     | 17.5     | 11.5    | 8.8      | 8.5      | 7.0      | 9.2      |
| miR-378h    | 4.4     | 6.8     | 3.6     | 6.8     | 3.3     | 3.7     | 4.5     | 1.6     | -1.2   | 1.2     | -2.0     | 1.2     | -2.3     | -1.9     | -1.1     | -4.0     |
| miR-378i    | 1734.4  | 1489.4  | 1181.3  | 2381.5  | 1066.4  | 1073.1  | 1030.8  | 1040.5  | 122.5  | -122.5  | -430.6   | 769.6   | -545.5   | -538.8   | -581.2   | -571.4   |
| miR-379-3p  | 57.7    | 65.0    | 46.4    | 41.2    | 55.7    | 58.0    | 53.7    | 55.8    | -3.6   | 3.6     | -15.0    | -20.1   | -5.7     | -3.4     | -7.7     | -5.6     |
| miR-379-5p  | 356.1   | 316.0   | 947.9   | 342.3   | 1103.7  | 1002.2  | 1249.0  | 1193.3  | 20.1   | -20.1   | 611.8    | 6.3     | 767.7    | 666.2    | 913.0    | 857.3    |
| miR-380-3p  | 19.2    | 20.0    | 34.9    | 14.7    | 55.7    | 35.5    | 42.8    | 61.1    | -0.4   | 0.4     | 15.3     | -4.9    | 36.1     | 15.8     | 23.1     | 41.5     |
| miR-380-5p  | 0.0     | 7.0     | 12.0    | 6.8     | 18.9    | 11.1    | 13.9    | 21.3    | -3.5   | 3.5     | 8.5      | 3.3     | 15.4     | 7.6      | 10.4     | 17.8     |
| miR-381-3p  | 254.4   | 250.0   | 483.9   | 205.6   | 500.4   | 618.9   | 599.7   | 574.4   | 2.2    | -2.2    | 231.7    | -46.6   | 248.3    | 366.7    | 347.5    | 322.2    |
| miR-382-3p  | 42.6    | 54.0    | 75.8    | 39.5    | 71.1    | 83.5    | 84.5    | 80.5    | -5.7   | 5.7     | 27.5     | -8.8    | 22.8     | 35.1     | 36.2     | 32.2     |
| miR-382-5p  | 23.4    | 15.0    | 19.0    | 14.7    | 24.9    | 17.0    | 14.9    | 16.5    | 4.2    | -4.2    | -0.2     | -4.5    | 5.7      | -2.2     | -4.3     | -2.7     |
| miR-409-3p  | 17.9    | 12.0    | 49.9    | 21.5    | 48.0    | 56.1    | 31.8    | 41.7    | 2.9    | -2.9    | 35.0     | 6.5     | 33.1     | 41.2     | 16.9     | 26.8     |
| miR-409-5p  | 130.6   | 157.0   | 71.8    | 108.5   | 99.4    | 87.1    | 84.5    | 71.8    | -13.2  | 13.2    | -72.0    | -35.3   | -44.4    | -56.7    | -59.3    | -72.0    |
| miR-410-3p  | 121.0   | 148.0   | 191.6   | 151.4   | 241.7   | 224.5   | 244.6   | 191.1   | -13.5  | 13.5    | 57.1     | 16.9    | 107.2    | 90.0     | 110.1    | 56.6     |
| miR-411-3p  | 59.1    | 95.0    | 63.4    | 70.6    | 78.8    | 69.1    | 85.5    | 83.0    | -17.9  | 17.9    | -13.7    | -6.4    | 1.8      | -8.0     | 8.5      | 5.9      |
| miR-411-5p  | 324.5   | 240.0   | 456.0   | 266.6   | 561.3   | 499.3   | 526.1   | 464.7   | 42.2   | -42.2   | 173.7    | -15.6   | 279.1    | 217.0    | 243.8    | 182.5    |
| miR-421     | 122.4   | 103.0   | 20.0    | 137.8   | 10.3    | 27.3    | 9.9     | 26.2    | 9.7    | -9.7    | -92.7    | 25.1    | -102.4   | -85.4    | -102.7   | -86.5    |
| miR-422a    | 21.7    | 13.7    | 37.9    | 20.6    | 43.3    | 38.5    | 42.3    | 39.8    | 4.0    | -4.0    | 20.2     | 2.9     | 25.6     | 20.8     | 24.6     | 22.1     |
| miR-423-3p  | 1358.4  | 1481.9  | 1231.2  | 1155.7  | 1205.7  | 1557.6  | 1249.0  | 1465.0  | -61.8  | 61.8    | -188.9   | -264.4  | -214.5   | 137.4    | -171.1   | 44.8     |
| miR-423-5p  | 394.6   | 516.0   | 364.2   | 497.1   | 481.6   | 501.5   | 507.2   | 573.4   | -60.7  | 60.7    | -91.1    | 41.8    | 26.3     | 46.2     | 51.9     | 118.1    |
| miR-424-5p  | 9.6     | 27.0    | 40.9    | 28.2    | 55.7    | 60.6    | 55.7    | 55.3    | -8.7   | 8.7     | 22.6     | 9.9     | 37.4     | 42.2     | 37.4     | 37.0     |
| miR-425-3p  | 151.2   | 166.0   | 114.7   | 190.9   | 123.4   | 139.6   | 105.4   | 116.4   | -7.4   | 7.4     | -43.9    | 32.3    | -35.2    | -19.0    | -53.2    | -42.2    |
| miR-425-5p  | 1208.5  | 988.9   | 874.0   | 1126.4  | 961.5   | 1072.4  | 1009.4  | 1036.2  | 109.8  | -109.8  | -224.7   | 27.6    | -137.3   | -26.4    | -89.4    | -62.6    |
| miR-4286    | 411.1   | 455.0   | 572.7   | 437.2   | 591.3   | 551.0   | 649.4   | 294.0   | -21.9  | 21.9    | 139.7    | 4.2     | 158.2    | 117.9    | 216.3    | -139.1   |
| miR-429     | 0.0     | 0.0     | 0.0     | 0.0     | 0.0     | 3.7     | 0.0     | 5.8     | 0.0    | 0.0     | 0.0      | 0.0     | 0.0      | 3.7      | 0.0      | 5.8      |
| miR-431-5p  | 0.0     | 0.0     | 0.0     | 0.0     | 9.4     | 12.6    | 9.0     | 0.0     | -2.5   | 2.5     | -2.5     | -2.5    | 6.9      | 10.1     | 6.5      | -2.5     |
| miR-433-3p  | 6.9     | 0.0     | 6.0     | 0.0     | 10.3    | 8.1     | 7.0     | 11.6    | 3.4    | -3.4    | 2.5      | -3.4    | 6.8      | 4.7      | 3.5      | 8.2      |
| miR-433-5p  | 0.0     | 0.0     | 0.0     | 0.0     | 0.0     | 3.7     | 0.0     | 0.0     | 0.0    | 0.0     | 0.0      | 0.0     | 0.0      | 3.7      | 0.0      | 0.0      |
| miR-4443    | 0.0     | 0.0     | 11.0    | 0.0     | 16.3    | 5.9     | 13.9    | 6.8     | 0.0    | 0.0     | 11.0     | 0.0     | 16.3     | 5.9      | 13.9     | 6.8      |
| miR-4448    | 8.2     | 6.0     | 20.0    | 14.7    | 36.8    | 49.5    | 71.6    | 22.3    | 1.1    | -1.1    | 12.8     | 7.6     | 29.7     | 42.4     | 64.5     | 15.2     |

|               |         |         |         |         |         |         |         |         |        |         |         |         |         |         |         |         |
|---------------|---------|---------|---------|---------|---------|---------|---------|---------|--------|---------|---------|---------|---------|---------|---------|---------|
| miR-4454      | 6040.0  | 3152.8  | 1633.3  | 5993.3  | 852.6   | 661.7   | 864.2   | 433.7   | 1443.6 | -1443.6 | -2963.1 | 1396.9  | -3743.8 | -3934.7 | -3732.2 | -4162.7 |
| miR-449a      | 0.0     | 5.0     | 6.0     | 10.2    | 10.3    | 8.9     | 7.0     | 0.0     | -2.5   | 2.5     | 3.5     | 7.7     | 7.8     | 6.4     | 4.5     | -2.5    |
| miR-4508      | 0.0     | 0.0     | 0.0     | 10.2    | 4.3     | 0.0     | 5.0     | 0.0     | 0.0    | 0.0     | 0.0     | 10.2    | 4.3     | 0.0     | 5.0     | 0.0     |
| miR-450a-1-3p | 0.0     | 0.0     | 13.0    | 0.0     | 45.4    | 32.5    | 43.8    | 46.6    | 0.0    | 0.0     | 13.0    | 0.0     | 45.4    | 32.5    | 43.8    | 46.6    |
| miR-450a-5p   | 651.0   | 603.0   | 628.1   | 513.5   | 616.1   | 568.3   | 617.6   | 631.6   | 24.0   | -24.0   | 1.1     | -113.5  | -10.9   | -58.7   | -9.4    | 4.6     |
| miR-4510      | 0.0     | 0.0     | 1.5     | 0.0     | 4.3     | 2.6     | 5.2     | 3.4     | 0.0    | 0.0     | 1.5     | 0.0     | 4.3     | 2.6     | 5.2     | 3.4     |
| miR-451a      | 15363.2 | 16132.1 | 15309.4 | 17286.3 | 13235.2 | 17110.0 | 14160.1 | 16765.1 | -384.5 | 384.5   | -438.3  | 1538.7  | -2512.4 | 1362.4  | -1587.5 | 1017.4  |
| miR-452-5p    | 12.4    | 7.0     | 9.0     | 9.0     | 14.6    | 8.9     | 7.0     | 13.6    | 2.7    | -2.7    | -0.7    | -0.6    | 4.9     | -0.8    | -2.7    | 3.9     |
| miR-455-3p    | 266.7   | 324.0   | 254.4   | 279.0   | 193.7   | 254.1   | 193.9   | 203.7   | -28.6  | 28.6    | -40.9   | -16.3   | -101.7  | -41.3   | -101.4  | -91.6   |
| miR-455-5p    | 622.8   | 651.0   | 919.9   | 607.8   | 955.5   | 999.3   | 1067.1  | 1012.9  | -14.1  | 14.1    | 283.0   | -29.1   | 318.6   | 362.4   | 430.2   | 376.0   |
| miR-4770      | 0.0     | 15.0    | 0.0     | 0.0     | 6.0     | 0.0     | 7.0     | 0.0     | -7.5   | 7.5     | -7.5    | -7.5    | -1.5    | -7.5    | -0.5    | -7.5    |
| miR-4791      | 9.6     | 5.0     | 6.0     | 0.0     | 8.6     | 0.0     | 0.0     | 0.0     | 2.3    | -2.3    | -1.3    | -7.3    | 1.3     | -7.3    | -7.3    | -7.3    |
| miR-483-3p    | 0.0     | 0.0     | 0.0     | 0.0     | 0.0     | 4.4     | 0.0     | 0.0     | 0.0    | 0.0     | 0.0     | 0.0     | 0.0     | 4.4     | 0.0     | 0.0     |
| miR-484       | 1501.4  | 1516.9  | 1033.7  | 1300.3  | 1081.4  | 1145.5  | 1118.8  | 747.1   | -7.8   | 7.8     | -475.5  | -208.8  | -427.7  | -363.7  | -390.4  | -762.1  |
| miR-485-3p    | 0.0     | 0.0     | 10.0    | 0.0     | 14.6    | 23.6    | 11.9    | 20.4    | 0.0    | 0.0     | 10.0    | 0.0     | 14.6    | 23.6    | 11.9    | 20.4    |
| miR-485-5p    | 0.0     | 0.0     | 0.0     | 0.0     | 0.0     | 8.1     | 8.0     | 4.9     | 0.0    | 0.0     | 0.0     | 0.0     | 0.0     | 8.1     | 8.0     | 4.9     |
| miR-486-3p    | 28.9    | 41.0    | 21.5    | 24.9    | 22.7    | 23.6    | 18.4    | 22.8    | -6.1   | 6.1     | -13.5   | -10.1   | -12.2   | -11.3   | -16.5   | -12.1   |
| miR-486-5p    | 7570.9  | 8240.0  | 6282.8  | 6458.2  | 5215.7  | 4326.4  | 4919.1  | 4802.0  | -334.6 | 334.6   | -1622.7 | -1447.3 | -2689.8 | -3579.0 | -2986.4 | -3103.5 |
| miR-487b-3p   | 26.1    | 32.0    | 12.0    | 18.1    | 0.0     | 13.3    | 13.9    | 6.8     | -2.9   | 2.9     | -17.1   | -11.0   | -29.1   | -15.8   | -15.1   | -22.3   |
| miR-490-3p    | 724.6   | 578.0   | 927.9   | 535.5   | 782.4   | 951.3   | 878.1   | 892.6   | 73.3   | -73.3   | 276.6   | -115.8  | 131.1   | 300.0   | 226.8   | 241.3   |
| miR-490-5p    | 11.0    | 9.0     | 18.0    | 18.1    | 27.4    | 29.5    | 17.9    | 16.5    | 1.0    | -1.0    | 8.0     | 8.1     | 17.4    | 19.5    | 7.9     | 6.5     |
| miR-491-5p    | 0.0     | 0.0     | 0.0     | 6.8     | 4.3     | 6.6     | 8.0     | 6.8     | 0.0    | 0.0     | 0.0     | 6.8     | 4.3     | 6.6     | 8.0     | 6.8     |
| miR-494-3p    | 56.4    | 54.0    | 43.9    | 46.3    | 44.6    | 35.5    | 21.9    | 41.7    | 1.2    | -1.2    | -11.3   | -8.9    | -10.6   | -19.7   | -33.3   | -13.5   |
| miR-495-3p    | 20.6    | 35.0    | 48.9    | 47.4    | 56.6    | 59.1    | 41.8    | 56.3    | -7.2   | 7.2     | 21.1    | 19.6    | 28.7    | 31.3    | 14.0    | 28.5    |
| miR-496       | 9.6     | 8.0     | 7.0     | 0.0     | 7.7     | 23.6    | 8.0     | 4.9     | 0.8    | -0.8    | -1.8    | -8.8    | -1.1    | 14.8    | -0.9    | -4.0    |
| miR-497-3p    | 8.2     | 0.0     | 5.0     | 0.0     | 12.9    | 3.7     | 12.9    | 7.8     | 4.1    | -4.1    | 0.9     | -4.1    | 8.7     | -0.4    | 8.8     | 3.6     |
| miR-497-5p    | 955.6   | 813.0   | 1349.9  | 971.6   | 1384.8  | 1392.2  | 1568.3  | 1334.0  | 71.3   | -71.3   | 465.7   | 87.3    | 500.5   | 507.9   | 684.0   | 449.8   |
| miR-499a-3p   | 0.0     | 0.0     | 0.0     | 0.0     | 0.0     | 5.9     | 0.0     | 0.0     | 0.0    | 0.0     | 0.0     | 0.0     | 0.0     | 5.9     | 0.0     | 0.0     |
| miR-499a-5p   | 7611.5  | 6955.6  | 1793.9  | 8005.4  | 720.7   | 813.9   | 755.8   | 707.3   | 327.9  | -327.9  | -5489.6 | 721.9   | -6562.9 | -6469.7 | -6527.8 | -6576.3 |
| miR-501-3p    | 55.0    | 42.0    | 19.0    | 23.7    | 27.4    | 36.9    | 20.9    | 25.2    | 6.5    | -6.5    | -29.5   | -24.8   | -21.1   | -11.6   | -27.6   | -23.3   |
| miR-501-5p    | 0.0     | 0.0     | 0.0     | 0.0     | 0.0     | 3.7     | 5.0     | 0.0     | 0.0    | 0.0     | 0.0     | 0.0     | 0.0     | 3.7     | 5.0     | 0.0     |
| miR-504-5p    | 23.4    | 62.0    | 5.0     | 33.9    | 0.0     | 36.2    | 12.9    | 9.7     | -19.3  | 19.3    | -37.7   | -8.8    | -42.7   | -6.5    | -29.8   | -33.0   |
| miR-505-3p    | 12.4    | 11.0    | 6.0     | 5.6     | 17.1    | 27.3    | 11.9    | 32.0    | 0.7    | -0.7    | -5.7    | -6.0    | 5.5     | 15.6    | 0.2     | 20.3    |
| miR-532-3p    | 59.1    | 67.0    | 11.0    | 64.4    | 22.3    | 26.6    | 26.9    | 14.6    | -3.9   | 3.9     | -52.1   | 1.3     | -40.8   | -36.5   | -36.2   | -48.5   |
| miR-532-5p    | 1109.5  | 1024.9  | 726.4   | 935.4   | 792.7   | 860.4   | 832.4   | 778.1   | 42.3   | -42.3   | -340.9  | -131.8  | -274.6  | -206.8  | -234.9  | -289.1  |
| miR-542-3p    | 618.7   | 546.0   | 620.6   | 590.9   | 695.0   | 601.2   | 747.8   | 746.1   | 36.4   | -36.4   | 38.3    | 8.5     | 112.6   | 18.8    | 165.5   | 163.7   |
| miR-542-5p    | 0.0     | 0.0     | 0.0     | 0.0     | 0.0     | 0.0     | 5.0     | 0.0     | 0.0    | 0.0     | 0.0     | 0.0     | 0.0     | 0.0     | 5.0     | 0.0     |
| miR-543       | 0.0     | 14.0    | 0.0     | 6.8     | 0.0     | 0.0     | 0.0     | 0.0     | -7.0   | 7.0     | -7.0    | -0.2    | -7.0    | -7.0    | -7.0    | -7.0    |
| miR-574-3p    | 445.5   | 503.0   | 464.0   | 416.9   | 456.7   | 655.8   | 530.0   | 416.2   | -28.8  | 28.8    | -10.3   | -57.3   | -17.5   | 181.6   | 55.8    | -58.0   |
| miR-574-5p    | 52.2    | 79.0    | 154.7   | 62.1    | 181.7   | 195.0   | 214.8   | 231.9   | -13.4  | 13.4    | 89.0    | -3.5    | 116.0   | 129.4   | 149.2   | 166.3   |
| miR-582-5p    | 108.6   | 104.0   | 118.7   | 115.2   | 115.7   | 121.9   | 114.4   | 117.4   | 2.3    | -2.3    | 12.4    | 8.9     | 9.4     | 15.6    | 8.1     | 11.1    |
| miR-592       | 23.4    | 14.0    | 81.8    | 21.5    | 133.7   | 145.5   | 148.2   | 144.6   | 4.7    | -4.7    | 63.1    | 2.8     | 115.0   | 126.8   | 129.5   | 125.9   |
| miR-6128      | 0.0     | 0.0     | 0.0     | 0.0     | 0.9     | 0.0     | 0.0     | 0.0     | 0.0    | 0.0     | 0.0     | 0.0     | 0.9     | 0.0     | 0.0     | 0.0     |
| miR-615-3p    | 41.2    | 30.0    | 18.0    | 19.2    | 4.3     | 15.5    | 11.9    | 0.0     | 5.6    | -5.6    | -17.7   | -16.4   | -31.3   | -20.1   | -23.7   | -35.6   |
| miR-6516-3p   | 71.5    | 11.0    | 32.9    | 75.7    | 0.0     | 11.8    | 6.0     | 4.9     | 30.2   | -30.2   | -8.3    | 34.4    | -41.2   | -29.4   | -35.3   | -36.4   |

|             |         |         |         |         |         |         |         |         |        |         |          |          |          |          |          |          |
|-------------|---------|---------|---------|---------|---------|---------|---------|---------|--------|---------|----------|----------|----------|----------|----------|----------|
| miR-652-3p  | 2447.3  | 2689.9  | 2478.4  | 2373.6  | 2462.8  | 2531.8  | 2626.4  | 2502.1  | -121.3 | 121.3   | -90.2    | -195.0   | -105.8   | -36.8    | 57.8     | -66.4    |
| miR-652-5p  | 0.0     | 0.0     | 0.0     | 0.0     | 12.9    | 5.2     | 8.0     | 6.8     | 0.0    | 0.0     | 0.0      | 0.0      | 12.9     | 5.2      | 8.0      | 6.8      |
| miR-664a-3p | 0.0     | 0.0     | 0.0     | 0.0     | 0.0     | 3.7     | 0.0     | 0.0     | 0.0    | 0.0     | 0.0      | 0.0      | 0.0      | 3.7      | 0.0      | 0.0      |
| miR-671-3p  | 61.9    | 87.0    | 30.9    | 56.5    | 36.8    | 30.3    | 15.9    | 15.5    | -12.6  | 12.6    | -43.5    | -17.9    | -37.6    | -44.2    | -58.5    | -58.9    |
| miR-671-5p  | 68.7    | 57.0    | 157.6   | 81.3    | 167.1   | 188.3   | 192.9   | 163.0   | 5.9    | -5.9    | 94.8     | 18.5     | 104.2    | 125.5    | 130.1    | 100.1    |
| miR-675-3p  | 0.0     | 0.0     | 0.0     | 0.0     | 0.0     | 0.0     | 6.0     | 0.0     | 0.0    | 0.0     | 0.0      | 0.0      | 0.0      | 0.0      | 6.0      | 0.0      |
| miR-7-1-3p  | 160.9   | 158.0   | 53.9    | 151.4   | 41.1    | 59.1    | 24.9    | 34.9    | 1.4    | -1.4    | -105.5   | -8.0     | -118.3   | -100.3   | -134.6   | -124.5   |
| miR-7-5p    | 4023.4  | 4201.4  | 11535.9 | 4381.6  | 14400.1 | 12116.4 | 14359.4 | 21608.6 | -89.0  | 89.0    | 7423.5   | 269.1    | 10287.7  | 8004.0   | 10246.9  | 17496.2  |
| miR-708-3p  | 199.4   | 190.0   | 50.9    | 144.6   | 123.4   | 110.0   | 154.1   | 74.7    | 4.7    | -4.7    | -143.8   | -50.1    | -71.3    | -84.6    | -40.5    | -120.0   |
| miR-708-5p  | 741.1   | 623.0   | 534.8   | 803.3   | 560.4   | 517.7   | 530.0   | 482.2   | 59.1   | -59.1   | -147.2   | 121.2    | -121.6   | -164.3   | -152.0   | -199.8   |
| miR-744-3p  | 34.4    | 34.0    | 28.9    | 36.2    | 26.6    | 30.3    | 36.8    | 27.2    | 0.2    | -0.2    | -5.3     | 2.0      | -7.6     | -3.9     | 2.6      | -7.0     |
| miR-744-5p  | 627.0   | 518.0   | 460.0   | 561.5   | 554.4   | 585.7   | 541.0   | 636.5   | 54.5   | -54.5   | -112.5   | -11.0    | -18.0    | 13.2     | -31.5    | 64.0     |
| miR-760     | 0.0     | 0.0     | 0.0     | 0.0     | 0.0     | 3.7     | 0.0     | 4.9     | 0.0    | 0.0     | 0.0      | 0.0      | 0.0      | 3.7      | 0.0      | 4.9      |
| miR-766-3p  | 6.9     | 0.0     | 0.0     | 0.0     | 0.0     | 0.0     | 0.0     | 4.9     | 3.4    | -3.4    | -3.4     | -3.4     | -3.4     | -3.4     | -3.4     | 1.4      |
| miR-7704    | 0.0     | 0.0     | 0.0     | 0.0     | 7.7     | 0.0     | 0.0     | 0.0     | 0.0    | 0.0     | 0.0      | 0.0      | 0.0      | 7.7      | 0.0      | 0.0      |
| miR-7975    | 9.6     | 0.0     | 0.0     | 0.0     | 0.0     | 0.0     | 0.0     | 0.0     | 4.8    | -4.8    | -4.8     | -4.8     | -4.8     | -4.8     | -4.8     | -4.8     |
| miR-7977    | 3111.4  | 1677.9  | 660.5   | 2996.1  | 445.6   | 424.7   | 455.5   | 132.9   | 716.8  | -716.8  | -1734.2  | 601.4    | -1949.1  | -1970.0  | -1939.2  | -2261.7  |
| miR-802     | 3556.9  | 3721.8  | 6238.9  | 3603.9  | 7766.3  | 8087.1  | 7874.1  | 8118.6  | -82.5  | 82.5    | 2599.6   | -35.4    | 4127.0   | 4447.8   | 4234.8   | 4479.3   |
| miR-873-5p  | 0.0     | 0.0     | 6.0     | 0.0     | 4.3     | 0.0     | 0.0     | 0.0     | 0.0    | 0.0     | 6.0      | 0.0      | 4.3      | 0.0      | 0.0      | 0.0      |
| miR-874-3p  | 34.4    | 45.0    | 46.9    | 33.9    | 54.8    | 90.1    | 60.7    | 68.9    | -5.3   | 5.3     | 7.2      | -5.8     | 15.2     | 50.4     | 21.0     | 29.2     |
| miR-874-5p  | 6.9     | 6.0     | 0.0     | 0.0     | 0.0     | 4.4     | 5.0     | 0.0     | 0.4    | -0.4    | -6.4     | -6.4     | -6.4     | -2.0     | -1.5     | -6.4     |
| miR-877-3p  | 0.0     | 6.0     | 0.0     | 5.6     | 0.0     | 0.0     | 0.0     | 0.0     | -3.0   | 3.0     | -3.0     | 2.6      | -3.0     | -3.0     | -3.0     | -3.0     |
| miR-877-5p  | 0.0     | 0.0     | 0.0     | 0.0     | 0.0     | 3.7     | 0.0     | 0.0     | 0.0    | 0.0     | 0.0      | 0.0      | 0.0      | 3.7      | 0.0      | 0.0      |
| miR-885-5p  | 0.0     | 0.0     | 0.0     | 0.0     | 0.0     | 10.3    | 7.0     | 0.0     | 0.0    | 0.0     | 0.0      | 0.0      | 0.0      | 10.3     | 7.0      | 0.0      |
| miR-9-3p    | 28.9    | 35.0    | 28.6    | 38.0    | 27.1    | 27.6    | 20.6    | 27.8    | -3.1   | 3.1     | -3.3     | 6.1      | -4.8     | -4.4     | -11.4    | -4.1     |
| miR-9-5p    | 165.9   | 160.3   | 153.3   | 163.8   | 163.7   | 165.9   | 166.1   | 164.9   | 2.8    | -2.8    | -9.8     | 0.7      | 0.6      | 2.8      | 3.0      | 1.8      |
| miR-92a-3p  | 2663.2  | 2982.3  | 3874.2  | 2569.6  | 4438.0  | 4873.3  | 4803.7  | 4448.4  | -159.6 | 159.6   | 1051.5   | -253.1   | 1615.3   | 2050.6   | 1981.0   | 1625.6   |
| miR-92b-3p  | 169.1   | 158.0   | 55.9    | 133.3   | 18.0    | 106.4   | 63.6    | 59.2    | 5.6    | -5.6    | -107.7   | -30.2    | -145.6   | -57.2    | -99.9    | -104.4   |
| miR-93-3p   | 46.7    | 65.0    | 23.9    | 47.4    | 32.6    | 22.2    | 9.0     | 16.5    | -9.1   | 9.1     | -31.9    | -8.4     | -23.3    | -33.7    | -46.9    | -39.4    |
| miR-93-5p   | 4819.0  | 3966.8  | 4247.4  | 4955.1  | 4234.1  | 4638.1  | 4513.9  | 4062.2  | 426.1  | -426.1  | -145.5   | 562.2    | -158.8   | 245.2    | 120.9    | -330.7   |
| miR-96-3p   | 0.0     | 8.0     | 0.0     | 7.9     | 0.0     | 0.0     | 0.0     | 0.0     | -4.0   | 4.0     | -4.0     | 3.9      | -4.0     | -4.0     | -4.0     | -4.0     |
| miR-96-5p   | 1049.1  | 1145.9  | 1140.4  | 1045.0  | 1177.4  | 1345.6  | 1191.4  | 1871.5  | -48.4  | 48.4    | 42.9     | -52.5    | 79.9     | 248.1    | 93.9     | 774.0    |
| miR-98-3p   | 30.2    | 28.0    | 128.7   | 9.0     | 136.3   | 155.1   | 121.3   | 148.4   | 1.1    | -1.1    | 99.6     | -20.1    | 107.1    | 126.0    | 92.2     | 119.3    |
| miR-98-5p   | 1037.2  | 1054.3  | 8218.7  | 1311.9  | 8873.1  | 6272.1  | 8244.6  | 11101.0 | -8.6   | 8.6     | 7172.9   | 266.1    | 7827.3   | 5226.3   | 7198.8   | 10055.2  |
| miR-9985    | 41.9    | 47.3    | 40.1    | 45.6    | 32.3    | 33.4    | 40.4    | 17.9    | -2.7   | 2.7     | -4.6     | 0.9      | -12.4    | -11.3    | -4.2     | -26.7    |
| miR-99a-3p  | 0.0     | 7.0     | 54.9    | 0.0     | 61.7    | 63.5    | 64.6    | 75.7    | -3.5   | 3.5     | 51.4     | -3.5     | 58.2     | 60.0     | 61.1     | 72.2     |
| miR-99a-5p  | 66021.6 | 58741.3 | 16198.4 | 52268.6 | 13576.7 | 12557.2 | 13478.9 | 13835.1 | 3640.2 | -3640.2 | -46183.1 | -10112.9 | -48804.7 | -49824.2 | -48902.5 | -48546.4 |
| miR-99b-3p  | 22.0    | 26.0    | 20.0    | 38.4    | 6.0     | 12.6    | 33.8    | 17.5    | -2.0   | 2.0     | -4.0     | 14.4     | -18.0    | -11.4    | 9.8      | -6.5     |
| miR-99b-5p  | 12313.7 | 11046.4 | 5563.4  | 9270.8  | 5237.5  | 5569.4  | 5055.8  | 4954.8  | 633.6  | -633.6  | -6116.6  | -2409.3  | -6442.5  | -6110.6  | -6624.2  | -6725.2  |

**Supplementary Table 4.** Oligonucleotides (primers, miRNAs, and siRNAs) used in this study**(A) Primers**

| Name          | Sequence (5' to 3')                                                                                            | Orientation | Spices      | Application |
|---------------|----------------------------------------------------------------------------------------------------------------|-------------|-------------|-------------|
| Hoxd4-1       | GATGAAGAAGGTGCACGTGAATTCG                                                                                      | Forward     | Mouse       | Genotyping  |
| Hoxd4-1r      | GTGTGAGCGATTTCAATCCGACG                                                                                        | Reverse     | Mouse       | Genotyping  |
| Hoxd3-1       | GAATCCCGACAGAACTCCAAGC                                                                                         | Forward     | Mouse       | Genotyping  |
| Hoxd3-1r      | GAAGTGGAACTCCTTCTCCAGC                                                                                         | Reverse     | Mouse       | Genotyping  |
| Hoxd10-1      | CTTCCAGAAGACAGGAGCTGC                                                                                          | Forward     | Mouse       | Genotyping  |
| Hoxd10-1r     | GAGCCAATTGCTGGTTGGAGTATC                                                                                       | Reverse     | Mouse       | Genotyping  |
| lacZ-1        | CTGTTCCGTCATAGCGATAACGAG                                                                                       | Forward     | Mouse       | Genotyping  |
| lacZ-1r       | GTTGCACTACGCGTACTGTGAG                                                                                         | Reverse     | Mouse       | Genotyping  |
| Hoxd4-l4      | CTGAAAGATAGGCCATCGGAGACC                                                                                       | Forward     | Mouse       | Genotyping  |
| 10bWT-1r      | GAAGTTGGATCTTTCTGCAGGAGG                                                                                       | Reverse     | Mouse       | Genotyping  |
| LacZ-2        | CCATTACCAGTTGGTCTGGTGTC                                                                                        | Forward     | Mouse       | Genotyping  |
| 10bWT-1r      | GAAGTTGGATCTTTCTGCAGGAGG                                                                                       | Reverse     | Mouse       | Genotyping  |
| 10b-2         | CTGCTTCAGGCGATGGTGAGTAAG                                                                                       | Forward     | Mouse       | Genotyping  |
| 10b-2r        | CTTGCCATGCCACATTTGAGAGTC                                                                                       | Reverse     | Mouse       | Genotyping  |
| 10b-1a        | AGAAGGTCCTGGCTGCTCAGCTAC                                                                                       | Forward     | Mouse       | Genotyping  |
| 10b-4r        | GAATCTGTGACTATGTGGGTACCAC                                                                                      | Reverse     | Mouse       | Genotyping  |
| Snord66       | CTGAGACCACATGATGGGATTG                                                                                         | Forward     | Mouse       | qPCR        |
| miR-10b-5p    | TACCCTGTAGAACCGAATTTGTG                                                                                        | Forward     | Mouse/Human | qPCR        |
| miRTQ         | CGAATTCTAGAGCTCGAGGCAGGCGACATGGCTGGCTAGT<br>TAAGCTTGGTACCGAGCTCGGATCCACTAGTCCTTTTTTTTTT<br>TTTTTTTTTTTTTTTTTVN | Forward     | Mouse/Human | qPCR        |
| miRTQ-rev     | CGAATTCTAGAGCTCGAGGCAGG                                                                                        | Reverse     | Mouse/Human | qPCR        |
| 10b-scram-f   | CTAGAACAGTCTGAGTAGTACATTGATCT                                                                                  | Forward     | Mouse       | Clone       |
| 10b-scram-r   | CTAGAGATCAATGTACTACTCAGACTGTT                                                                                  | Reverse     | Mouse       | Clone       |
| 10b-mKlf-Xf   | CTAGACATGTTTTGTAGAAATGTGACAGGGTACTAT                                                                           | Forward     | Mouse       | Clone       |
| 10b-mKlf-Xr   | ACATGTTTTGTAGAAATGTGACAGGGTACTATCTAG                                                                           | Reverse     | Mouse       | Clone       |
| 10b-mKlf-f    | CATGTTTTGTAGAAATGTGACAGGG                                                                                      | Forward     | Mouse       | Clone       |
| 10b-mKlf-r    | CCCTGTCACA TTTCTACAAA ACATG                                                                                    | Reverse     | Mouse       | Clone       |
| 10b-mKlfMu-Xf | CTAGACATGTTTTGTAGAAATGTGCCTGAGCACTAT                                                                           | Forward     | Mouse       | Clone       |
| 10b-mKlfMu-Xr | CTAGATAGTGCTCAGGCACATTTCTACAAAACATGT                                                                           | Reverse     | Mouse       | Clone       |
| 10b-mKlfMu-f  | GTTTTGTAGAAATGTGCCTGAGCAC                                                                                      | Forward     | Mouse       | Clone       |
| 10b-mKlfMu-r  | GTGCTCAGGCACATTTCTACAAAAC                                                                                      | Reverse     | Mouse       | Clone       |
| mKlf-1        | GAGGTGGGCAAGCTGAACAGAATC                                                                                       | Forward     | Mouse       | Clone       |
| mKlf-1r       | CTTCCTCTCCAGGATCGACTCAC                                                                                        | Reverse     | Mouse       | Clone       |
| 10b-hKLF-Xf   | CTAGAGATGTTTTGTAGAAATAAGACAGGGTACTAT                                                                           | Forward     | Human       | Clone       |
| 10b-hKLF-Xr n | CTAGATAGTACCCTGTCTTATTTCTACAAAACATCT                                                                           | Reverse     | Human       | Clone       |
| 10b-hKLF-f    | GATGTTTTGTAGAAATAAGACAGGG                                                                                      | Forward     | Human       | Clone       |
| 10b-hKLF-r    | CCCTGTCTTATTTCTACAAAACATC                                                                                      | Reverse     | Human       | Clone       |
| hKLF-1        | GCTGAACAGAATCGCCTCTGCAG                                                                                        | Forward     | Human       | Clone       |
| hKLF-1r       | GCTTCCTCTCCAGGATGGACTC                                                                                         | Reverse     | Human       | Clone       |
| pLen-f        | GAGTTGTGTTTGTGGACGAAGTAC                                                                                       | Forward     | Plasmid     | Clone       |

|        |                         |         |         |       |
|--------|-------------------------|---------|---------|-------|
| pLen-r | GCAGCGTATCCACATAGCGT    | Reverse | Plasmid | Clone |
| pLen-1 | CGTTTAGTGAACCGTCAGATCGC | Forward | Plasmid | Clone |
| Luc-1r | GTTGCTCTCCAGCGGTTCCATC  | Reverse | Plasmid | Clone |
| Luc-2r | CGTTTCATAGCTTCTGCCAACC  | Reverse | Plasmid | Clone |

### (B) miRNAs and siRNAs

| Name              | Sequence (5' to 3')     | Orientation | Spices      | Application      |
|-------------------|-------------------------|-------------|-------------|------------------|
| miR-10b mimic     | UACCCUGUAGAACCGAAUUUGUG | Sense       | Mouse/Human | In vitro/In vivo |
|                   | TTAUGGGACAUCUUGGCUUAAAC | Antisense   |             |                  |
| miR-10b inhibitor | UACCCUGUAGAACCGAAUUUGUG | Sense       | Mouse/Human | In vitro/In vivo |
|                   | AUGGGACAUCUUGGCUUAAACAC | Antisense   |             |                  |
| siKlf11-1         | GUUCCUCCCAAGUAGUUAtt    | Sense       | Mouse       | In vitro/In vivo |
|                   | UAACUACUUGGGAAGGAACag   | Antisense   |             |                  |
| siKlf11-2         | UCUGAUUUCUGUCCUGUAtt    | Sense       | Mouse       | In vitro/In vivo |
|                   | UACAGGGACAGAAAUCAGAgg   | Antisense   |             |                  |
| siKLF11-1         | ACAGUUUACUCAGCACUAAtt   | Sense       | Human       | In vitro         |
|                   | UUAGUGCUGAGUAAACUGUcc   | Antisense   |             |                  |
| siKLF11-2         | CACCUGAACUACCAAAAAGAtt  | Sense       | Human       | In vitro         |
|                   | UCUUUUGGUAGUUCAGGUGtg   | Antisense   |             |                  |

**Supplementary Table 5.** Primary antibodies used in this study

| <b>Name</b>                         | <b>Vendor (Item #)</b>           | <b>Host</b>  | <b>Reactivity</b> | <b>Clonality</b> | <b>MW (kDa)</b> | <b>Concentration</b> |
|-------------------------------------|----------------------------------|--------------|-------------------|------------------|-----------------|----------------------|
| KIT                                 | antibodies.com (A111143)         | Human,Rabbit |                   | Polyclonal       | 115             | 1:10 WES             |
| KiT                                 | R&D system (AF1356)              | Human,Goat   |                   | Polyclonal       |                 | 1:20 IHC             |
| KLF11                               | Antibodies-Online (ABIN324466)   | Rabbit       | Human, Mouse, Rat | Polyclonal       | 57              | 1:100                |
| Insulin                             | Abcam (ab181547)                 | Rabbit       | Human, Mouse, Rat | Monoclonal       |                 | 1:100                |
| APC-Cy7 anti-mouse CD45             | Biolegend (103116)               | Mouse        | Rat               | Polyclonal       | NA              | 1:5000 FACS          |
| GAPDH                               | Cell signaling (S2118)           | Rabbit       | Human, Mouse      | Polyclonal       | 36              | 1:500                |
| Alexa <sup>TM</sup> 594-anti-rabbit | Jackson ImmunoResearch (711-585) | Rabbit       | Donkey            | Polyclonal       | NA              | 1:500 IHC            |

**Supplementary Table 6.** Drugs used in this study

| <b>Group</b>  | <b>Dose</b>          | <b>Administration</b>     | <b>Frequency</b>           | <b>Class</b>                    |
|---------------|----------------------|---------------------------|----------------------------|---------------------------------|
| Sitagliptin   | 10mg/kg body weight  | Oral                      | Once per day till 4 weeks  | Diabetes medication             |
| Prucalopride  | 2mg/kg body weight   | Oral                      | Once per day till 4 weeks  | Chronic constipation medication |
| Metformin     | 250mg/kg body weight | Oral                      | Once per day till 4 weeks  | Diabetes medication             |
| Insulin       | 0.75U/Kg body weight | Intraperitoneal injection | Once per day till 4 weeks  | Diabetes medication             |
| Liraglutide   | 0.2mg/kg body weight | Subcutaneous Injection    | Twice per day till 2 weeks | Diabetes medication             |
| miR-10b mimic | 500 ng/g body weight | Intraperitoneal injection | Once per wees till 2 weeks |                                 |
